1 **DNA metabarcoding-based detection of non-indigenous invertebrates in recreational**  
2 **marinas: influence of sample type and seasonal variation**

3

4 Running title: Sample type and seasonal variation in marina's invertebrates

5

6 Ana S. Lavrador<sup>1,2\*</sup>, Fábio G. Amaral<sup>1,2</sup>, Jorge Moutinho<sup>1,2</sup>, Pedro E. Vieira<sup>1,2</sup>, Filipe O. Costa<sup>1,2</sup>  
7 & Sofia Duarte<sup>1,2\*</sup>

8

9 <sup>1</sup>Centre of Molecular and Environmental Biology (CBMA) and ARNET-Aquatic Research  
10 Network, Department of Biology, University of Minho, Campus de Gualtar, 4710-057 Braga,  
11 Portugal

12 <sup>2</sup>Institute of Science and Innovation for Bio-Sustainability (IB-S), University of Minho, Campus  
13 de Gualtar, 4710-057, Braga, Portugal

14 \*Corresponding author: [aslavrador@gmail.com](mailto:aslavrador@gmail.com)

15

16 **Abstract**

17 Monitoring of marine invertebrate non-indigenous species (NIS) using DNA metabarcoding can  
18 be strongly affected by selected sample type due to life history traits, such as habitat preferences  
19 and life cycles. Two marinas in the north of Portugal were sampled to assess the impact of sample  
20 type (hard and artificial substrates, water eDNA, and zooplankton) and season (spring, autumn,  
21 winter) on species and NIS recovery. Using two molecular markers - the mitochondrial  
22 cytochrome c oxidase subunit I (COI) and the small subunit ribosomal RNA (18S) - a total of 636  
23 species and 31 NIS were detected. Species numbers were slightly higher in the marina more  
24 exposed to maritime traffic, and the highest percentage of exclusive species was detected in  
25 zooplankton (up to 24%), as well as the highest numbers of NIS. Regarding season, the highest  
26 numbers of species and NIS were detected in the spring and autumn (varying within each marina).  
27 Taxonomic composition analysis revealed differences in species richness and community  
28 structure among seasons and sample types, particularly between hard and artificial substrates  
29 *versus* eDNA and zooplankton. Of the 31 NIS detected, six are potential first records for Portugal,  
30 which await morphology-based validation. No NIS were detected in all sample types nor in all  
31 sampled seasons. This highlights the need to employ different sampling approaches and markers,  
32 as well as consider seasonal variation and level of exposure to maritime-driven introductions to  
33 guarantee a comprehensive metabarcoding-based surveillance of NIS in recreational marinas.

34

35 Keywords: DNA metabarcoding; non-indigenous species; eDNA; settlement plates; zooplankton.

36

## 37 **Introduction**

38 Coastal ecosystems are regions of great ecological and socio-economic importance and a source  
39 of biological productivity, as well as of goods and services (Costanza et al. 1997). However, these  
40 are vulnerable regions, heavily impacted by human activities that often lead to loss of biodiversity  
41 (Turner and Rabalais 1994; Jackson et al. 2001). These ecosystems are also particularly  
42 susceptible to the introduction and spread of non-indigenous species (NIS).

43 Non-indigenous species are species that are introduced (naturally or by human mediation) outside  
44 their natural occurrence range. If these species successfully establish, reproduce, and spread, they  
45 can become invasive, posing a threat to the ecosystem's integrity (Bax et al. 2003; Katsanevakis  
46 et al. 2014; Rilov and Crooks 2009). The introduction of NIS has become so frequent and relevant  
47 with the increase of globalization, that they are now included in important legislations and  
48 directives such as the European Union Regulation 1143/2014 on Invasive Alien Species and the  
49 Marine Strategy Framework Directive (European Commission 2008; European Union 2014; Diagne  
50 et al. 2021). It is also a concern for the conservation of oceans and marine resources (addressed  
51 in the UN Sustainable Development Goal SDG14), as invasive marine species can cause severe  
52 disruptions in native biodiversity, alter habitats, and compromise the delicate balance of marine  
53 environments, threatening the health and resilience of marine ecosystems.

54 One of the most significant vectors of NIS introductions in coastal ecosystems is shipping.  
55 Shipping vessels can transport NIS through biofouling (species that attach themselves directly to  
56 the ship's surfaces, as well as species that live amongst those communities), and in the ballast  
57 waters (that are loaded into the ship to adjust buoyancy and secure stability and manoeuvrability,  
58 carrying an array of different species and life-forms) (Rilov and Crooks 2009; Sardain et al. 2019).  
59 Recreational marinas and harbours are, thus, important points of entrance for marine NIS, as they  
60 are recipients of different types of shipping vessels, harbouring several physical structures (e.g.,  
61 pontoons, cables, buoys, anchors) that allow colonization and spread of fouling organisms  
62 (Glasby et al. 2007). With the increment in globalization and transport of goods and services by  
63 shipping (which is estimated to continue to increase up to 240-1209% by 2050) it is important to  
64 prioritize NIS surveillance in harbours, recreational marinas, and vicinity areas (Sardain et al.  
65 2019; Bailey et al. 2020).

66 Most NIS-monitoring programs rely on the observation and morphological identification of  
67 species (Chainho et al. 2015; Mancinelli et al. 2017; Afonso et al. 2020). However, with the  
68 decline in the number of taxonomists worldwide, and challenging species identifications in  
69 aquatic systems (e.g., due to low visibility, cryptic taxa, low-density populations and life stages  
70 not amenable to morphological identification) (Knowlton 1993; Hopkins and Freckleton 2002;  
71 Kim and Byrne 2006), DNA-based methods emerged as complementary or alternative  
72 approaches. These techniques allow for the simultaneous processing of a large number of samples,  
73 and accurate identification of multiple taxa from diverse environmental samples, with increased

74 sensitivity and specificity. They often reveal hidden diversity, while allowing greater time and  
75 cost effectiveness (Holman et al., 2019; Pochon et al., 2015; Rey et al., 2020; Taberlet et al.,  
76 2012). In particular, DNA/eDNA metabarcoding, that combines amplicon barcoding with high-  
77 throughput sequencing (HTS), is a powerful tool for identifying multiple species from complex  
78 samples (bulk organismal samples, environmental samples) (Hajibabaei 2012; Taberlet et al.  
79 2012; Cristescu 2014). With this approach, accurate identifications of NIS adult, larvae and  
80 propagules can be obtained using standardized DNA barcode markers that target a wide  
81 taxonomic range of organisms in mixed samples. To that end, a partial segment of the  
82 mitochondrial cytochrome c oxidase subunit 1 (COI) gene has been established as a standard  
83 marker for monitoring metazoan diversity, providing reliable identifications, as well as the  
84 discrimination of closely related species (Hebert et al. 2003). Concurrently the small subunit  
85 ribosomal RNA gene (18S) has been widely employed in marine biomonitoring studies to detect  
86 eukaryotes, including macroinvertebrates (Pawlowski et al. 2018). DNA metabarcoding also  
87 allows the early detection of invasive species before its presence and impact become irreversible,  
88 and the increase of sampling density, compared to morphotaxonomic assessments, ultimately  
89 improving NIS monitoring in coastal ecosystems (Pochon et al. 2015; Holman et al. 2019).

90 The majority of European marine NIS are invertebrates (64.2% in 2020) (Zenetos et al. 2022).  
91 Marine invertebrates are a very diverse group of organisms, composed of many different phyla  
92 with distinct life cycles (i.e., with or without larval stage) and habitat preferences (i.e., benthic,  
93 pelagic, fouling organisms). As such, monitoring marine invertebrates requires various types of  
94 samples, as well as temporal and spatial assessments to recover a wider range of species and more  
95 accurately describe the communities present in coastal environments (Lehtiniemi et al. 2015;  
96 Koziol et al. 2018; Kraus et al. 2019). This is also important when monitoring non-indigenous  
97 invertebrate species as organisms introduced by hull fouling can pass to the hard artificial  
98 substrates of the marinas and harbours, through hull cleaning operations; or from the water  
99 column through larval stages or propagules (European Environment Agency 2021). Recent  
100 studies have shown that recreational marinas are more relevant for the spreading of NIS than it  
101 was supposed, as they present communities that diverge from those recovered in the nearest  
102 harbours, and some even present a higher number of NIS, or different NIS than those detected in  
103 the harbours (Ferrario et al. 2017; Chebaane et al. 2019; Afonso et al. 2020; Png-Gonzalez et al.  
104 2021). This suggests that recreational vessels, and not only larger industrial vessels, are very  
105 relevant vectors for NIS spreading (Ferrario et al. 2017; Chebaane et al. 2019; Afonso et al. 2020;  
106 Png-Gonzalez et al. 2021). This can also be explained due to the larger docking times of these  
107 vessels in the recreational marinas, as NIS spreading can vary with the origin of the vessels, as  
108 well as the duration of time moored to the marina (Martínez-laiz et al. 2019; Tempesti et al. 2022).  
109 Given the importance of the early detection and monitoring of marine invertebrate NIS in  
110 recreational marinas, and the role of season and sample type in NIS recovery through DNA

111 metabarcoding, our specific aims were to test the effects of these factors using as a case study two  
112 recreational marinas in the north of Portugal. These marinas differ in maritime traffic: Viana do  
113 Castelo, located in a region of low to moderate maritime traffic, and Porto Atlântico, near the  
114 second highest maritime traffic harbour in Portugal. For this study, we analysed communities  
115 recovered from five different sample types: marinas' hard substrates (i.e., pontoons, cables,  
116 buoys), artificial substrates (tri-dimensional sponges and acrylic plates), water for environmental  
117 DNA (eDNA), and zooplankton, in 3 seasons during 1 year (March 2020-March 2021), to  
118 determine its impact on macroinvertebrate species recovery, particularly NIS detection, through  
119 DNA metabarcoding.

120

## 121 **Results**

### 122 **Initial HTS datasets**

123 Two molecular markers were used for species identification through HTS. The total number of  
124 raw reads resulting from 90 datasets (three sampling points x two marinas x five substrates x three  
125 seasons) was 3.171,606 and 3.584,901 for COI and 18S, respectively. After primers sequences  
126 removal, and merging of forward and reverse reads in mothur, 65 and 75% of the reads were  
127 submitted respectively for analysis in mBRAVE and SILVAngs (2.067,067 reads for COI and  
128 2.693,307 for 18S). After subsequent filtration steps, 2.025,812 (COI) and 2.570,633 (18S) usable  
129 reads remained for taxonomic classification, of which 811,044 (40%) and 486,252 (19%) were  
130 assigned to species, for COI and 18S, respectively. From these, 749,290 and 444,877 reads  
131 belonged to marine/oligohaline invertebrates, of which 15% and 10% were assigned to non-  
132 indigenous species (NIS) (for COI and 18S, respectively) (Table S1). Overall, 18S recovered  
133 more species than COI. Given that a high percentage of species was detected exclusively by each  
134 marker, the remaining analyses were performed using the combined information from both  
135 markers. In this study, a total of 636 invertebrate species were recorded and 31 NIS detected.

136

### 137 **Effect of sample type in total species and NIS diversity**

138 Five types of samples were assessed to study its effect on the detection of total species and NIS  
139 in the two recreational marinas: organisms fouling hard substrates of the marina, organisms  
140 colonizing sponges and acrylic plates (artificial substrates), eDNA from the water, and  
141 zooplankton. In both marinas, considering the combined data from the three seasons, zooplankton  
142 was the strategy that recovered the highest numbers and percentage of exclusive species (17 to  
143 24%), followed by hard substrates and eDNA, with plates recovering the lowest numbers and  
144 percentage of exclusive species (up to three percent) (Fig. 1A and B). Individually, zooplankton  
145 recovered 67 to 59% of all species detected; sponges 47 to 33%; eDNA 46 to 40%; hard substrates  
146 44 to 41%; and plates 33 to 27%. eDNA and zooplankton were the sample types sharing the  
147 highest percentage of species (six to eight percent), followed by zooplankton and hard substrates

148 in Viana do Castelo (three percent) and hard substrates and sponges in Porto Atlântico (four  
149 percent), while the percentage of shared species was generally low among other pairs of sample  
150 types (zero to two percent).

151 Regarding NIS, zooplankton recovered the highest numbers in both marinas (along with hard  
152 substrates in Porto Atlântico), and the plates recovered the lowest number of NIS (Fig. 1C and D)  
153 (Table S2 and S3). When considering the overlap of species and NIS detected by all sample types,  
154 only eight and nine percent of the total species and eight and 20.8% of NIS (for Viana do Castelo  
155 and Porto Atlântico, respectively) were detected in common using all the sample types (Fig. 1).

156

157

158

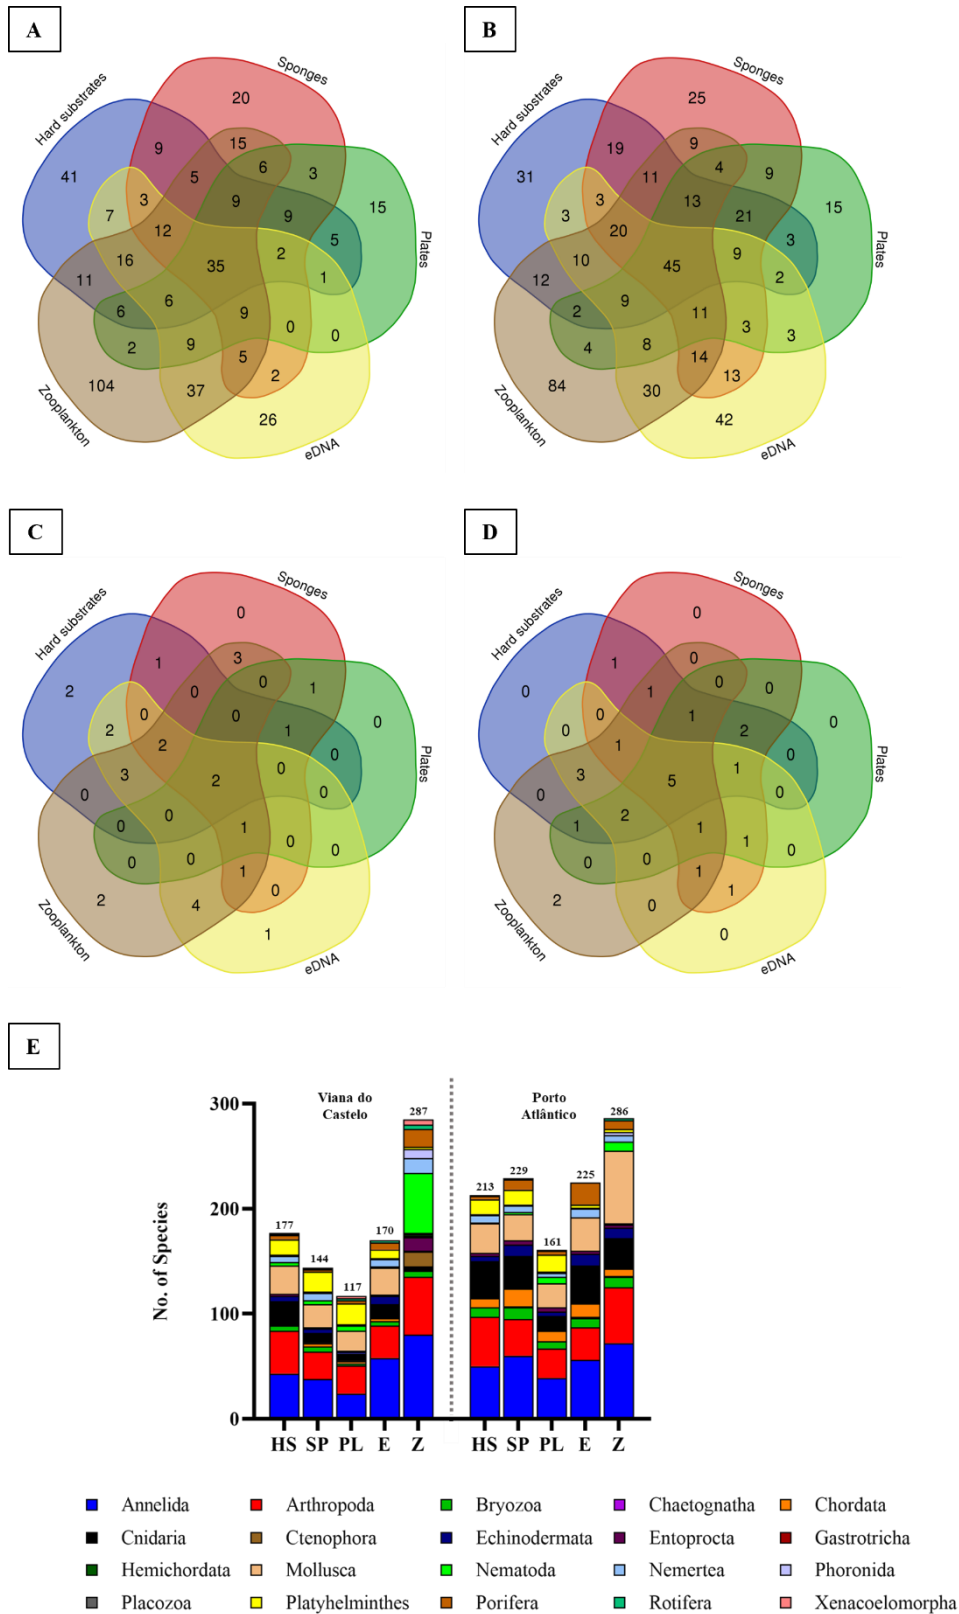

159

160

161

162

163

164

**Fig. 1** Total number of species (**A** and **B**) and NIS (**C** and **D**) detected in the three sampling seasons for each sample type, in the Viana do Castelo (**A** and **C**) and Porto Atlântico (**B** and **D**) recreational marinas. **E** Taxonomic composition of the total marine invertebrate species detected in the entirety of this study in the Viana do Castelo and Porto Atlântico recreational marinas, discriminated by sample type. HS: hard substrates. SP: sponges (artificial substrate). PL: acrylic plates (artificial substrate). E: eDNA. Z: zooplankton.

165 Regarding the taxonomic composition of these communities, in general most species detected in  
166 both recreational marinas belonged to Annelida and Arthropoda (Fig. 1E). Among sample types  
167 there were some notable differences particularly when comparing hard and artificial substrates  
168 *versus* eDNA and zooplankton samples. Overall, in hard and artificial substrates there were more  
169 species belonging to Platyhelminthes; less Porifera; less Nemertea in Viana do Castelo; and less  
170 Annelida and Arthropoda, when compared to eDNA and zooplankton. In contrast, there were  
171 more Nematoda, Phoronida and Rotifera species in eDNA and zooplankton samples and Mollusca  
172 species in zooplankton were detected in fewer numbers in Viana do Castelo, while in Porto  
173 Atlântico they were highly present. Overall, there were very few Chaetognatha, Gastrotricha and  
174 Hemichordata species identified in the entirety of the study, but these few records were mostly  
175 recovered in zooplankton samples. Mollusca species were always detected in higher numbers in  
176 eDNA samples and zooplankton in Porto Atlântico (Fig. 1E).  
177 When analysing the structure of communities among sample types, there is a clear separation  
178 between communities recovered in the hard substrates, sponges and plates *versus* communities  
179 recovered in eDNA and zooplankton, on each recreational marina (with the exception of eDNA  
180 samples from T2 in Viana do Castelo) (Fig. 2). The PCoAs also show distinct communities  
181 recovered in the winter, compared to summer and autumn samples in Viana do Castelo. The  
182 PERMANOVA analysis supported these conclusions, as the species composition recovered on  
183 each recreational marina was significantly influenced by sample type and season, and the  
184 interaction between these factors ( $P=0.001$ , for all factors, in both marinas) (Table S4).  
185

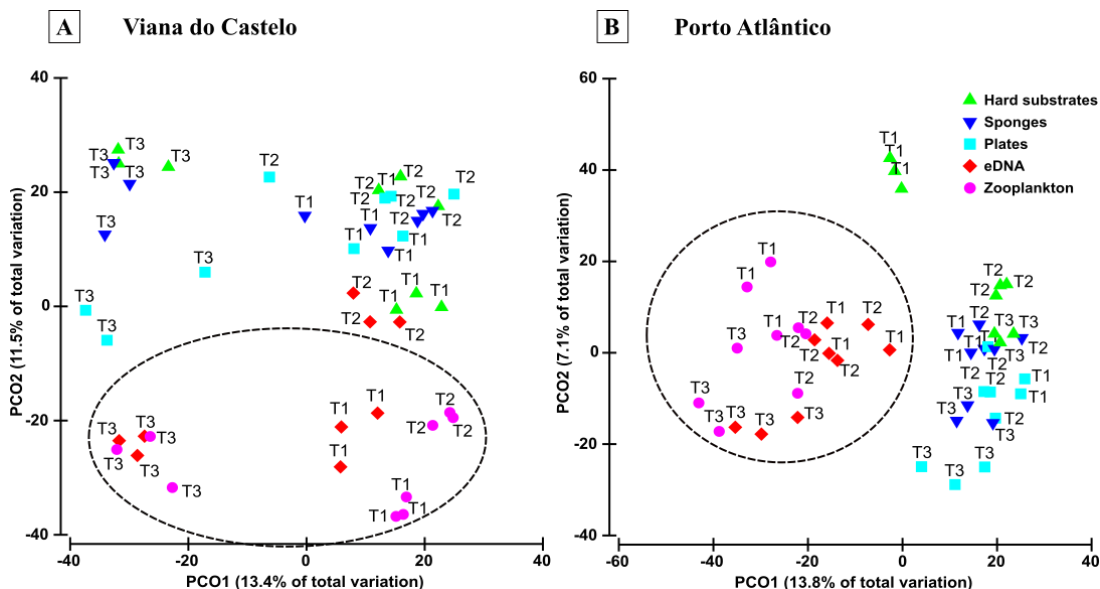

186  
187 **Fig. 2** Principal coordinate analysis (PCoA) of sampled communities in Viana do Castelo (A) and Porto Atlântico (B)  
188 recreational marinas, in order to analyse the effects of season and sample type on community structure. Hard substrates:  
189 organisms fouling the hard substrates of the marina. Sponges: organisms colonizing 3-dimensional sponges deployed  
190 in the marinas. Plates: organisms colonizing acrylic plates deployed in the marinas. eDNA: environmental DNA

191 extracted from water. Zooplankton: zooplankton collected from the water column. Black dotted line circles group  
192 eDNA and zooplankton samples.

193

#### 194 **Effect of season in total species and NIS diversity**

195 Regarding season, and combining data from all sample types, the highest numbers of species were  
196 detected in the spring (284) and autumn (348) (for Viana do Castelo and Porto Atlântico,  
197 respectively) and the lowest was detected in the winter, in both marinas. Only 11.3 to 24% of  
198 species were detected exclusively on each season. In terms of NIS, the highest numbers were  
199 detected in the autumn (21), for Viana do Castelo, and in spring (21), for Porto Atlântico, while  
200 the lowest were observed in the winter in Viana do Castelo and in the autumn and winter in Porto  
201 Atlântico (Fig. 3). Spring (Viana do Castelo) and autumn (Porto Atlântico) were the seasons that  
202 recorded the highest numbers of exclusive species (24 and 19.5%, respectively), while autumn  
203 was the season detecting the highest number of exclusive NIS in Viana do Castelo (23%) while  
204 in Porto Atlântico all seasons detected one NIS exclusively (4%). Spring and autumn were the  
205 seasons sharing the highest percentage of invertebrate species in both marinas (14 to 20%). In  
206 what respects NIS, spring and autumn were the seasons sharing the highest percentage for Viana  
207 do Castelo (27%), while the highest percentage of species shared for Porto Atlântico was found  
208 between spring and autumn as well as spring and winter (12.5%).

209

210



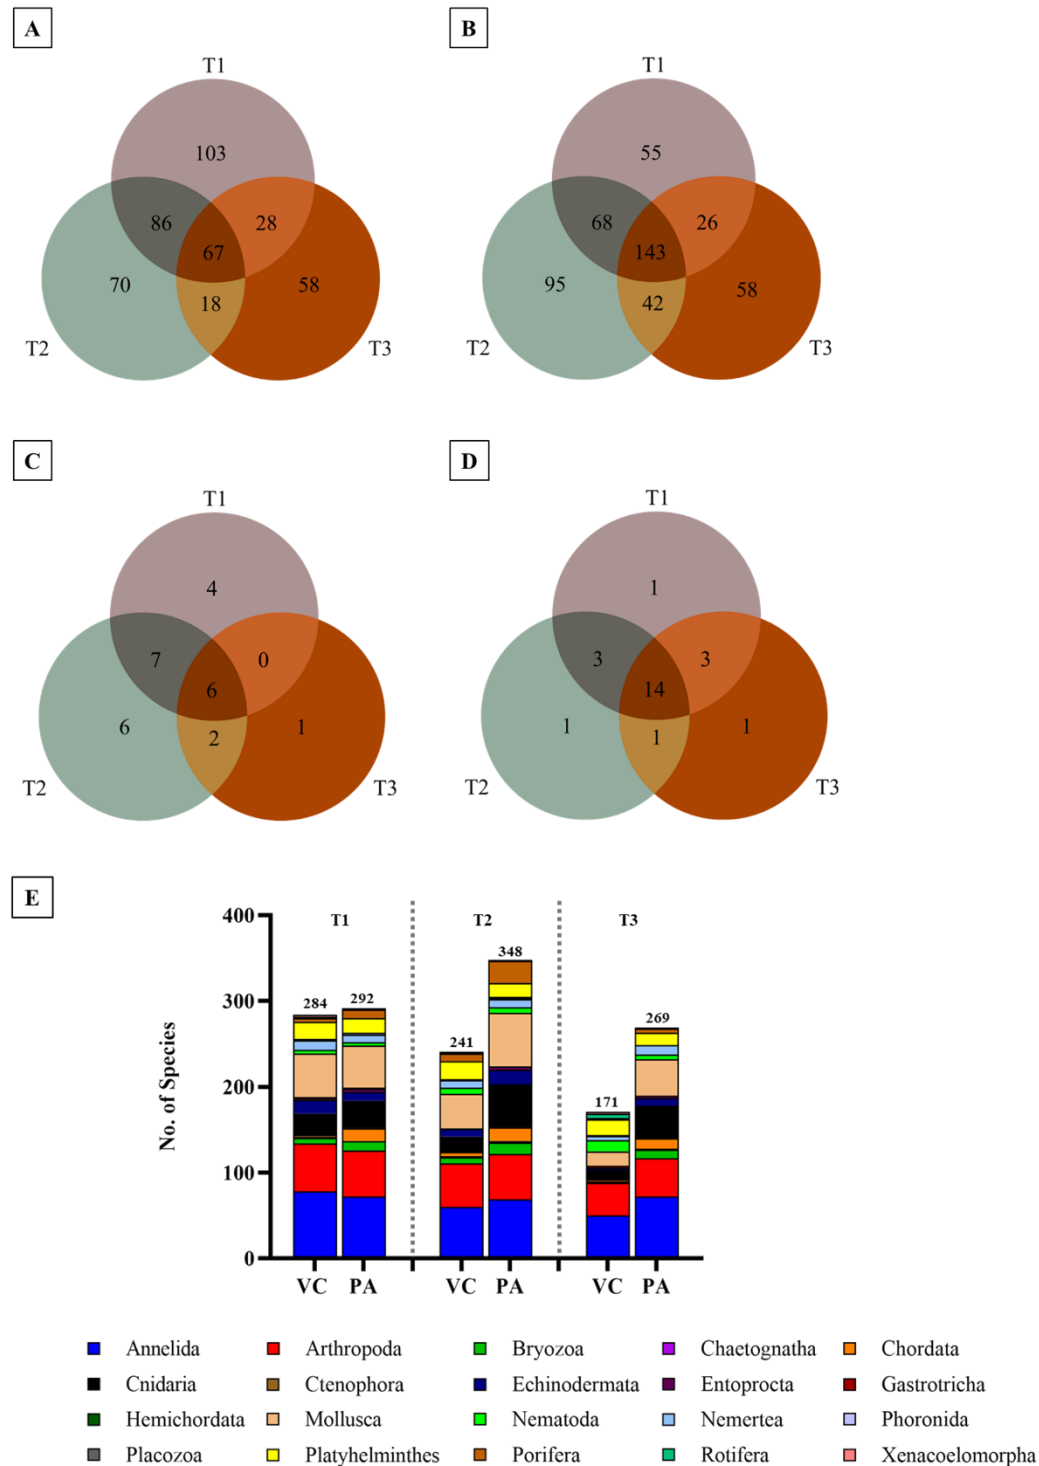

211

212 **Fig. 3** Total (A and B) and non-indigenous species (C and D) detected during the three sampling seasons, in the  
 213 recreational marinas of Viana do Castelo (A and C) and Porto Atlântico (B and D). E Taxonomic composition of the  
 214 total marine invertebrate species detected by season in the recreational marinas of Viana do Castelo (VC) and Porto  
 215 Atlântico (PA).

216

217 Regarding the variation of the taxonomic composition of the communities within each season, in  
 218 Viana do Castelo, in the spring and autumn, a very similar species composition was detected, with  
 219 a dominance of Arthropoda and Annelida, however Mollusca decreased sharply in winter. The

220 number of species belonging to Nematoda increased from spring to winter, while Echinodermata  
 221 had a pronounced decrease after spring. In the winter, most species belonged to Annelida,  
 222 Arthropoda and Platyhelminthes; however, there was an increase in the number of species  
 223 belonging to Rotifera, in comparison with the other seasons. In Porto Atlântico, Arthropoda,  
 224 Annelida, and Mollusca were the dominant groups in all seasons. From spring to autumn, there  
 225 was an increase in the number of species of Cnidaria and Porifera, that then decreased from  
 226 autumn to winter (Fig. 3E).

227

### 228 **Effect of the location in total species and NIS diversity**

229 In Viana do Castelo, in total, 430 species and 26 NIS were recovered, while in Porto Atlântico,  
 230 487 species and 24 NIS were identified (Fig. 4; Table S2 and S3). Forty four percent of species  
 231 and 61% of NIS were detected in common in both marinas, respectively.

232

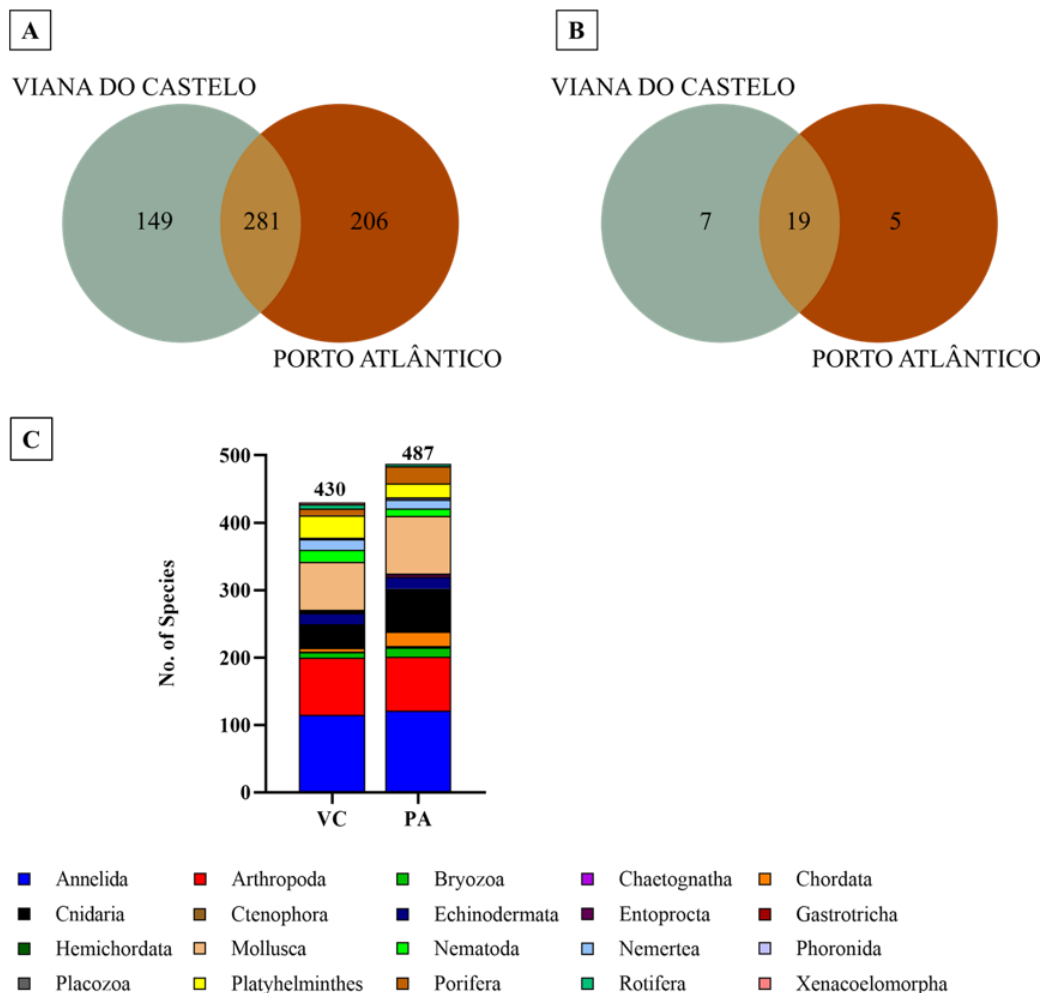

233

234 **Fig. 4** Total (A) and non-indigenous species (B) detected during the three sampling seasons and using all sample types,  
 235 in the Viana do Castelo and Porto Atlântico recreational marinas. (C) Taxonomic composition of the total marine  
 236 invertebrate species detected in the entirety of the study in the Viana do Castelo (VC) and Porto Atlântico (PA)  
 237 recreational marinas.

238 Globally, the distribution of representatives of major invertebrate groups was similar among the  
239 two marinas (Fig. 4), despite some specific differences. When considering data from the three  
240 seasons combined, in both marinas, the majority of species belonged to Annelida, Arthropoda,  
241 and Mollusca. In Porto Atlântico we recorded a higher percentage of Chordata (Ascidiacea) and  
242 a lower percentage of Rotifera, when compared to Viana do Castelo. There were also more  
243 Bryozoa, Cnidaria and Porifera species; while higher numbers of Nematoda, Nemertea and  
244 Platyhelminthes and Xenacoelomorpha were detected in Viana do Castelo.

245

#### 246 **Non-indigenous species (NIS) detection through DNA metabarcoding**

247 In this study a total of 31 marine invertebrate non-indigenous species were detected. The updated  
248 list of European NIS retrieved from public databases contained 1,333 species of  
249 marine/oligohaline invertebrates, of which 60 were also present in our final list of species that  
250 were detected in this study. The native distribution of these 60 species (European NIS) was  
251 analysed, resulting in a list of 31 NIS detected in this study that are non-indigenous in Portugal,  
252 of which 6 appear to be first records (Table S3). The majority of NIS detected belonged to  
253 Arthropoda (Thecostraca), Chordata (Ascidiacea) and Annelida (Fig. 5).

254 These NIS were all identified by DNA metabarcoding (molecular identification). Given the  
255 importance of reliable identifications of species, in particular of non-indigenous species that can  
256 trigger governmental actions, all molecular identifications of NIS were further analysed. Of the  
257 31 NIS, 12 were detected with COI exclusively, 11 with 18S exclusively, and 8 were detected by  
258 both markers (COI and 18S). 18S sequences for the 11 NIS exclusively detected with this marker  
259 were queried for a BLASTN search against the standard databases of NCBI, and only three  
260 molecular identifications were found to be reliable: *Eriocheir sinensis*, *Lovenella assimilis* and  
261 *Polydora onagawensis*. COI records were also further analysed, and of the 12 NIS exclusively  
262 detected with the COI marker, only five were records considered absolutely reliable:  
263 *Amphibalanus amphitrite*, *Austrominius modestus*, *Bugula neritina*, *Jassa slatteryi* and  
264 *Potamopyrgus antipodarum*. *Botrylloides violaceus* and *Lovenella assimilis* (detected exclusively  
265 with 18S) had also been identified using the COI marker. However, because the BINs that  
266 matched with these species were considered unreliable (e.g., also matched with other species),  
267 the species were removed from analysis with COI. Of these 31 NIS, 11 species are not suitable  
268 for morphological identification, as they were identified exclusively in eDNA or zooplankton  
269 samples; the remaining species were detected using sample types (hard and artificial substrates)  
270 that may allow further morphological verification, since bulk samples were again preserved in  
271 absolute ethanol, after DNA extraction.

272 Six NIS appear to be first records, at least to our knowledge, in Portugal: *Caprella mutica*,  
273 *Haliclystus tenuis*, *Lovenella assimilis*, *Oithona davisae*, *Phallusia nigra* and *Polydora*  
274 *onagawaensis*, recovered in different seasons and using different sample types. However, of

275 these, only *Oithona davisae* had reliable matching records in the reference DNA databases (it was  
276 detected with both molecular markers and the BIN matching recovered COI sequences is  
277 concordant – see methods section for more details). *Musculus lateralis* was also detected in all  
278 three seasons and in both marinas (except for Viana do Castelo in the winter) and although its  
279 presence has not yet been confirmed in Europe and, thus, we did not consider it as a NIS, it has a  
280 great potential to be one since it has been documented only in North and Central America.  
281 *Caprella mutica* was detected in Porto Atlântico in the spring and autumn (sponges) and winter  
282 (hard and artificial substrates). *Haliclystus tenuis* was detected only in the autumn in Viana do  
283 Castelo, but during the three seasons in Porto Atlântico (only in hard and artificial substrates).  
284 *Lovenella assimilis* was detected in the spring and autumn in hard substrates and sponges in Porto  
285 Atlântico; *Oithona davisae* in the first two seasons in Viana do Castelo (only in zooplankton, in  
286 spring, and in hard substrates, eDNA and zooplankton, in autumn); while in Porto Atlântico, it  
287 was detected in the spring (sponges and zooplankton) and winter (eDNA and zooplankton).  
288 *Phallusia nigra* was exclusively detected in Porto Atlântico, in sponges, in the spring and eDNA  
289 in the winter and, finally, *Polydora onagawaensis* was detected in Viana do Castelo in the first  
290 two seasons (hard substrates, eDNA and zooplankton, in spring, and, in zooplankton in autumn;  
291 and in Porto Atlântico in zooplankton in the winter. Overall, results found for each recreational  
292 marina show that no NIS were detected in all sample types and in all sampled seasons.  
293

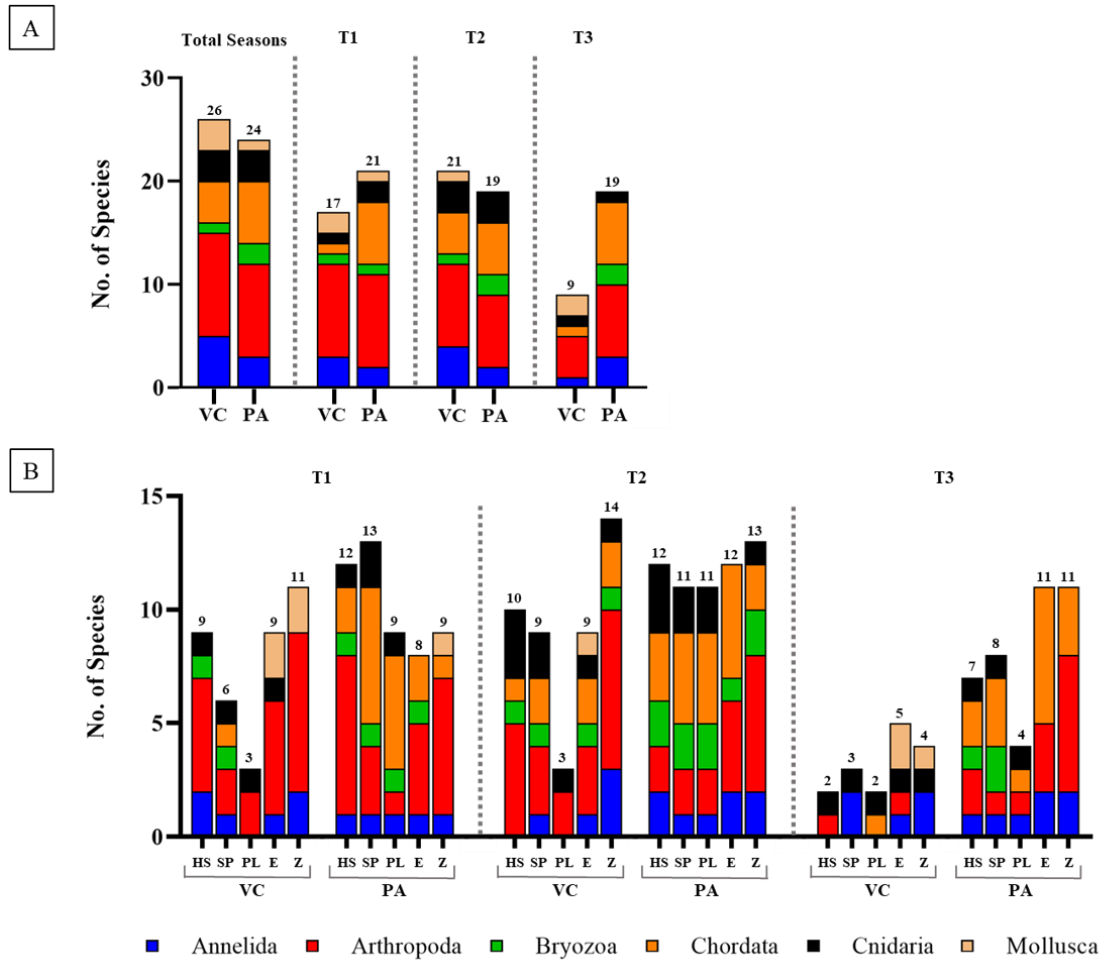

294

295

**Fig. 5** Taxonomic composition of the total non-indigenous marine invertebrate species detected in the entirety of this

296

study in the Viana do Castelo (VC) and Porto Atlântico (PA) recreational marinas, discriminated by season (A) and per

297

sample type, season, and recreational marina (B). T1: spring. T2: autumn. T3: winter. HS: hard substrates. SP: sponges

298

(artificial substrate). PL: acrylic plates (artificial substrate). E: eDNA. Z: zooplankton.

## 299 **Discussion**

300 The major findings of this study can be summarized in four main points: 1) only eight to nine  
301 percent of species were detected in all types of samples, and only up to 24% of the species were  
302 detected exclusively in one sample type; 2) the lowest species richness was consistently recorded  
303 in the winter in both marinas, and the highest number of invertebrate species and NIS was either  
304 found in the spring or autumn; 3) more invertebrate species were recovered in Porto Atlântico  
305 (487 species and 24 NIS), a marina more exposed to maritime traffic and displaying higher  
306 salinity, but more NIS were recovered in Viana do Castelo (430 species and 26 NIS); and 4) a  
307 total of 31 marine invertebrate NIS were detected, of which 6 are potential first records for  
308 Portugal.

309

### 310 **Effect of sample type in total species and NIS diversity**

311 One of the main goals of this study was to assess the influence of five different sample types –  
312 hard substrates, artificial substrates (sponges and plates), eDNA and zooplankton - in the recovery  
313 of marine invertebrate NIS in recreational marinas. To our knowledge, this is the first study using  
314 these five particular sampling strategies in the southwestern European coast employing molecular  
315 tools, and substantial differences were found in communities captured by hard and artificial  
316 substrates, particularly when compared to water eDNA and zooplankton. This is particularly  
317 relevant, since water eDNA has been the most employed for assessing NIS communities through  
318 DNA metabarcoding, in marine and coastal ecosystems (Borrell et al. 2017; Deiner et al. 2018;  
319 Grey et al. 2018; Rey et al. 2019; Wood et al. 2019; Suarez-Menendez et al. 2020; Duarte et al.  
320 2021). In fact, and also supporting our conclusions, studies employing both water eDNA and bulk  
321 organismal samples suggest that eDNA alone cannot replace organismal sampling (e.g., Huhn et  
322 al., 2020; Leduc, Lacoursière-Roussel, et al., 2019; Rey et al., 2020; Westfall et al., 2020).  
323 Although dominant phyla found in our study were common to all substrates - Arthropoda, and  
324 Annelida (except for eDNA samples in Porto Atlântico, where Annelida and Cnidaria were  
325 dominant) - the percentage of species captured by all was significantly low – up to nine percent -  
326 and highlights the need to employ multiple sampling strategies to recover as much as possible the  
327 diversity in a given location through DNA metabarcoding.

328 This is in line with few previous studies employing multiple sampling strategies (e.g., Koziol et  
329 al., 2018; Rey et al., 2020) that concluded that different sample types recover different sets of  
330 species. This result is not totally unexpected, since marine invertebrates are highly diverse  
331 phylogenetically, consisting of species with very different traits such as mobility and attachment  
332 styles, feeding habits and colonization processes (Brusca et al. 2016). This makes it more difficult  
333 to study these organisms and their assemblages over time and space. Some organisms colonize  
334 surfaces forming biofouling communities that change over time, while others are benthic (living  
335 on the sea floor), or possess larval stages that inhabit temporarily the water column and may be

336 mostly found in zooplankton, depending on the sampled season (Vinagre et al. 2020). In addition,  
337 and due to the presence of many artificial substrates (e.g., floating pontoons, cables, boats, buoys)  
338 and higher availability of nutrients, recreational marinas are highly prone to be colonized by  
339 biofouling communities (e.g., mussel lines) which *per se* can also constitute an augmented surface  
340 of potential niches available for NIS settlement (Png-Gonzalez et al. 2021).

341 In our study, plates recovered the lowest number of species and NIS – see Tables S2 and S3 - and  
342 communities in plates, as well as in sponges or hard substrates were dominated by Annelida and  
343 Arthropoda (regardless of season and marina). Previous studies aiming at assessing NIS diversity  
344 in hard substrates of Portuguese recreational marinas by using morphology-based approaches also  
345 showed a dominance of Arthropoda and Annelida (Afonso et al. 2020). In addition, a dominance  
346 of Arthropoda on PVC plates (deployed for approx. 3 months) was also previously found in the  
347 port of Bilbao (Spain) (Rey et al. 2020). But in a six-year survey using PVC plates deployed in a  
348 recreational marina in Madeira island (collected from 3 to 74 months), Bryozoa and Ascidiacea  
349 were the most represented groups (Canning-Clode et al. 2013). Also, Ascidiacea dominated plates  
350 deployed for 2 months in two coastal ports in Western Australia (Koziol et al., 2018).

351 On the other hand, zooplankton recovered the highest number of species and a few taxonomic  
352 groups were indeed predominantly found in this sample type, such as Nematoda, Phoronida and  
353 Rotifera, as well as a higher number of Annelida, Arthropoda and Mollusca species (in Porto  
354 Atlântico) and Nematoda (in Viana do Castelo). This is not totally unexpected since marine  
355 zooplankton community includes many different species of animals (i.e., from microscopic  
356 protozoans to large dimension animals), including holo- (spending their entire lives in the pelagic  
357 environment – e.g., Rotifera) and meroplanktonic species (i.e., eggs and larval stages of many  
358 benthic invertebrates' species that are temporary members of the plankton).

359 Previous studies also employing DNA metabarcoding on multiple substrates reached conclusions  
360 similar to ours - each sampling method recovered a distinct set of organisms (Koziol et al. 2018;  
361 Pearman et al. 2021; Rey et al. 2020). And although comparisons among studies are hard to reach  
362 since sampling designs usually differ (i.e., sampling effort – including spatial and temporal) as  
363 well as the use of different methodologies along the DNA metabarcoding analytical chain (i.e.,  
364 DNA extraction protocols, molecular markers and primers, bioinformatic pipelines), most studies  
365 have attained the same conclusion: (e)DNA metabarcoding is a very proficient tool for monitoring  
366 and identifying species and taxonomic profiling of communities. However, a sampling design  
367 combining multiple sample types, spatio-temporal variation, and the use of multiple molecular  
368 markers, may be needed for a more comprehensive surveillance of NIS in these systems. We  
369 support these conclusions as our study revealed that if only one sample type had been used  
370 exclusively to monitor species and NIS communities in these marinas, 33 to 73% of all species  
371 and 25 to 81% NIS would have gone unnoticed (depending on sample type and marina). Some of  
372 these examples include *Mercenaria mercenaria*, *Mya arenaria*, *Polydora cornuta*, *Potamopyrgus*

373 *antipodarum* and *Streblospio benedicti* that were exclusively detected on zooplankton and/or  
374 eDNA samples, while *Blackfordia virginica*, *Caprella mutica*, *Haliclystus tenuis* and *Lovenella*  
375 *assimilis* were detected exclusively in hard and/or in artificial substrates.

376

### 377 **Effect of season in total species and NIS diversity**

378 There were prominent differences in community composition of samples retrieved in the winter  
379 *versus* those retrieved in the spring and autumn in Viana do Castelo. This is expected as winter  
380 affects species richness and diversity due to its lower temperatures (Blomquist and Bonsdorff  
381 1986). In marine invertebrates it has also a notable influence on its life cycle, for example, certain  
382 crustaceans and molluscs enter a state of dormancy or reduced activity due to the low  
383 environmental temperature, affecting their availability in the ecosystem (Boss 1974; Alekseev  
384 and Starobogatov 1996). In this period there is also a lower photoperiod which leads to limited  
385 food availability (Cloern and Jassby 2010) which combined with less shelter availability can force  
386 species to adapt or seek refuge in different habitats. The water temperature data collected during  
387 this study also supports these conclusions as it was very similar in all seasons, but significantly  
388 lower in the winter (Fig. S1). All these factors contribute to fluctuations in species composition  
389 and abundance. These differences due to seasonality further justify the need to sample broader  
390 time spans to better understand species, NIS communities and their dynamics and to further  
391 correlate NIS introductions with biotic and abiotic factors (Gittenberger et al. 2023).

392

### 393 **Effect of location on total species and NIS recovery**

394 The two recreational marinas studied have particular geographic settings that can account for  
395 some of the differences observed. Viana do Castelo marina is located on the north bank of the  
396 Lima River estuary, it is more sheltered, and the water has a lower current flow (personal  
397 observation). Porto Atlântico marina is around 2.5 miles from the mouth of the Douro River and  
398 at the entrance of the Leixões trading seaport, which is the second largest in Portugal, in terms of  
399 maritime traffic. The trading ports closest to each of the recreational marinas also present different  
400 levels of vessels' flow, which could justify the higher presence of species in Porto Atlântico  
401 marina. Data collected from each port from March 2020 to March 2021 shows that 746 vessels  
402 from 38 different countries were docked on the Leixões port, while Viana do Castelo harboured  
403 203 vessels from 22 countries (approximately one quarter of Leixões vessels) (Fig. S2). Although  
404 NIS origins and introduction pathways were not in the scope of this study, considering that the  
405 main vector of NIS introductions in aquatic ecosystems in Europe is through shipping (both  
406 biofouling and ballast waters), it is important to analyse the marina's vessels flow and  
407 permanence, as well as its origin (Katsanevakis et al. 2013). In our study, even though the Porto  
408 Atlântico marina was near a harbour with a higher flux of vessels that had a broader number of  
409 countries of origin, higher numbers of NIS were detected in Viana do Castelo. However, this



410 difference in vessel flux can account for the higher number of invertebrate species found in Porto  
411 Atlântico. In the latter, communities seemed also to be more affected by the sample type than  
412 season, probably due to geographical differences of the marina, as well as of the different  
413 chemical parameters of the water (greater salinity in Porto Atlântico).

414

#### 415 **Non-indigenous species (NIS) detection through DNA metabarcoding**

416 In this study, a total of 31 NIS was detected by DNA metabarcoding, six of which are potential  
417 first records for Portugal. Eight of these NIS are also present in the National List of Invasive  
418 Species (by the Portuguese Institute for Nature Conservation and Forests): *Amphibalanus*  
419 *amphitrite*, *Austrominius modestus*, *Blackfordia virginica*, *Botryllus schlosseri*, *Corella eumyota*,  
420 *Mya arenaria*, and *Tricellaria inopinata*, as well as *Eriocheir sinensis* which is also listed as one  
421 of the 100 of the world's worst invasive alien species by the International Union for Conservation  
422 of Nature (IUCN) (Lowe et al. 2000; Decreto-Lei n° 92/2019. 2019). Coastal species and NIS  
423 have been usually monitored through observational and morphotaxonomic approaches. With the  
424 progress of sequencing technology, DNA-based methods are becoming part of monitoring efforts  
425 and gradually implemented in formal national monitoring programmes (Weigand et al. 2019).  
426 Indeed, previous studies indicate that metabarcoding delivers results comparable to  
427 morphological surveys, with similar implications for management actions, at a considerably lower  
428 cost (Borrell et al. 2017; Ji et al. 2013; Rey et al. 2020). The use of DNA metabarcoding has many  
429 advantages, including the possibility to screen numerous species simultaneously. However, for a  
430 more robust identification of NIS, species detected by molecular methods should be confirmed  
431 through morphological identification to prevent false positives (Fonseca et al. 2023) or using more  
432 targeted molecular approaches (e.g. qPCR, ddPCR) (Ammon et al. 2018; Wood et al. 2019). To  
433 the best of our knowledge, official NIS lists, such as those released by the International Council  
434 for the Exploration of the Sea (ICES) and the Convention for the Protection of the Marine  
435 Environment of the North-East Atlantic (OSPAR) commission, for example, are opting to include  
436 identifications obtained through environmental DNA only if they were also supported by  
437 morphological identifications. This is due to the limitations of DNA metabarcoding  
438 identifications that include the incompleteness of reference libraries; operational limitations (false  
439 positives and negatives, primer bias and contamination) and the lack of standardization (Ruppert  
440 et al. 2019; Duarte et al. 2021), as well as the inability to generate absolute abundance data and  
441 population status. Other complications may arise due to the inaccuracy or ambiguity of the  
442 reference sequences available in publicly-accessible databases (Fontes et al. 2021; Radulovici et  
443 al. 2021; Lavrador et al. 2023), which made us to exclude some NIS records from this study that  
444 had uncertain species identifications. For example, *Watersipora subtorquata*, a well-known and  
445 highly invasive NIS, was only detected (using the COI marker) in BINs assigned to more than  
446 one species, that could not be solved by our curation method. This was also the case for

447 *Botrylloides violaceus* and *Lovenella assimilis* as previously mentioned, that were only detected  
448 using 18S due to the inaccurate matching records in the COI reference data. However, in the case  
449 of *W. subtorquata*, studies have shown that several clades form a complex of cryptic species that  
450 make molecular identification more difficult or even unattainable until the status of the MOTUs  
451 of the complex is clarified (MacKie et al. 2012; Duncan et al. 2022). These still existing problems  
452 of lack of completion and uncertain accuracy of certain records in typically used databases were  
453 also noticeable in our study, as when curating NIS molecular detections with both markers, only  
454 27% (18S) to 42% (COI) of these records were considered reliable. These challenges highlight  
455 the need for further research to address taxonomic uncertainty issues and enhance the reliability  
456 of DNA metabarcoding as a tool for NIS identification.

457 Many efforts have been made recently to publish updated lists of NIS in European waters and to  
458 further monitor its distribution as well as to study its introduction history (Gittenberger et al. 2023;  
459 Jensen et al. 2023; Png-Gonzalez et al. 2023). In a recent NIS inventory in Spanish marine waters,  
460 approximately 65% of NIS were invertebrates (Png-Gonzalez et al. 2023). In Danish waters, 40%  
461 of NIS were invertebrates comprising both benthic invertebrates and zooplankton (Jensen et al.  
462 2023). In a study of NIS in the coastal waters of the Netherlands, the majority of invertebrate NIS  
463 belonged to Crustacea, Mollusca, and Annelida. With a mention that bryozoans have become a  
464 very relevant group of NIS, which may be connected to hull fouling as one of the most important  
465 vector in NIS introduction in recent years (Gittenberger et al. 2023). The same study also  
466 concluded that the number of introductions by biofouling appears to have increased in the last  
467 decade, while introductions by aquaculture and fisheries seem to have decreased (Gittenberger et  
468 al. 2023). In addition, it is very common to observe detached gear and other floating litter, namely  
469 plastic, in ports and recreational marinas. Marine plastic litter can also provide a surface for  
470 organisms' colonization and establishment, facilitating its spread to new locations (Barnes 2002;  
471 Ibabe et al. 2020). Some studies have shown the ability of biota to experience long trans-oceanic  
472 transport and to survive over years attached to floating litter (Therriault et al. 2018). This  
473 increasing interest in studying marine NIS, particularly in recreational marinas and ports, will  
474 help to understand the best methodologies to monitor these species, to potentially reach a global  
475 standardized protocol for detection of marine invertebrates NIS in these environments.

476

477 Although the use of DNA-based tools for monitoring marine invertebrate NIS in marinas and  
478 ports still needs further refinement, its exceptional potential is already apparent. The employment  
479 of these techniques constitutes an important complement or early warning system that will enable  
480 to manage in a timelier manner the detection of an invasive species at an early stage of  
481 introduction. For example, in the Port of Vlissingen, the genetic material of a NIS was detected  
482 three years before the specimens were physically found (Gittenberger et al. 2023). Early detection  
483 of NIS is also important to determine pathways and vectors of introductions, as well as to resolve

484 cryptic species (Gittenberger et al. 2023). This study demonstrated that to monitor NIS in  
485 recreational marinas, a combined approach is required (in order to recover a broader spectrum of  
486 taxa and to provide a comprehensive picture of the surveyed species and communities). To this  
487 end, it is indispensable to employ not only several genetic markers, but also to consider different  
488 sampling procedures, a variety of target substrates and seasonal variation in the sampling design.

489

## 490 **Materials and Methods**

### 491 **Study sites**

492 Sampling was conducted in two recreational marinas located in the Northwest of Portugal: the  
493 recreational marina of Viana do Castelo (Latitude: 41°40.5'N, Longitude: 8°50.3'W) and the  
494 Porto Atlântico marina (Latitude: 41°11.0'N, Longitude: 08°42.3'W) (Fig. 6). The recreational  
495 marina of Viana do Castelo is located in the north bank of the Lima River estuary, in the city of  
496 Viana do Castelo, and has a capacity for docking 300 vessels, a maximum length of 20 m and a  
497 depth of ca. 3 m, usually maintained by dredging (Porto de Viana do Castelo 2017). Several  
498 hundreds of boats dock at the recreational marina annually, the majority from France, the United  
499 Kingdom, the Netherlands, and Germany (Porto de Viana do Castelo, 2017), but overall, it  
500 presents a small ship traffic, since it is located further upstream, where commercial and fishing  
501 ports from Viana do Castelo are located.

502 The Porto Atlântico is an artificial marina with a capacity for docking 240 vessels, a maximum  
503 length of 35 m and a depth that can vary between 2 to 4 m. It is located 2.5 miles from the mouth  
504 of the Douro River, in Matosinhos and at the entrance of the Leixões harbour. The Porto Atlântico  
505 harbour is the second most relevant at national level in terms of merchandise movement with 15  
506 188 000 tons being handled in this harbour in 2021, of which ca. 79% was from international  
507 commerce (APDL, 2021). In 2021, Viana do Castelo harbour received a total of 250 ships, while  
508 Porto Atlântico harboured a total of 2,410 ships (APDL, 2021).

509

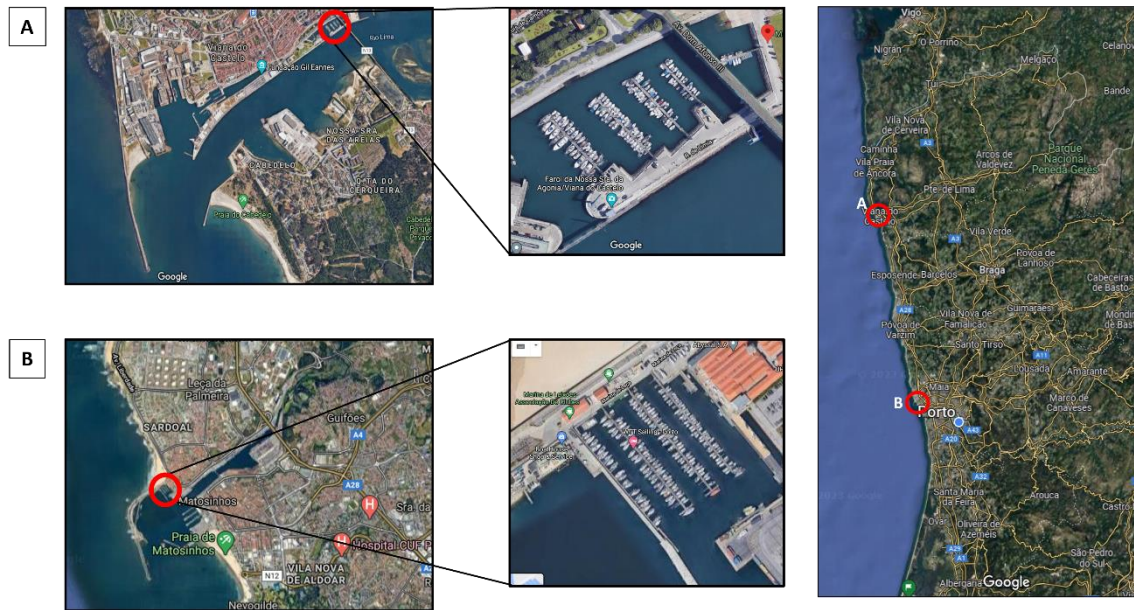

510

511 **Fig. 6.** Images retrieved from Google Maps showing on the left: the location of the two sampled recreational marinas  
512 and their proximity to the ocean; on the right: the northern region of Portugal containing the location of the two marinas,  
513 which are separated by a distance of approx. 56.8 km. **A** Viana de Castelo. **B** Porto Atlântico

514

515 Sampling was conducted in 3 different seasons – spring (T1), autumn (T2) and winter (T3), in 3  
516 different points of each marina, to obtain a larger spatial representativity. On each sampling date,  
517 physical and chemical parameters, namely conductivity, salinity and pH were measured using a  
518 multiparameter probe (Multiline F/set 3 no. 400327, WTW, Weilheim, Germany) (Table S5).  
519 Water temperature data were obtained from the Portuguese Institute for the Sea and Atmosphere  
520 (IPMA, I.P.) (<https://www.ipma.pt/pt/maritima/costeira/>), as well as data from the vessels on dock  
521 at each harbour closest to the recreational marinas, from the Administration of Douro, Leixões  
522 and Viana do Castelo Harbours (APDL) (<https://viana.apdl.pt/> and <https://leixoes.apdl.pt/> for  
523 Viana do Castelo and Porto Atlântico respectively), during the entire experiment time (March  
524 2020 to March 2021).

525

## 526 **Sample types**

527 On each sampling date, 5 strategies were employed: i) organisms fouling into hard substrates of  
528 each artificial marina; ii) organisms colonizing sponges (artificial substrates) and iii) organisms  
529 colonizing acrylic plates (artificial substrates) that were deployed on each marina, during fixed  
530 periods of time (4-5 months); iv) water collection for environmental DNA (eDNA) analysis and  
531 v) zooplankton collection from the water column.

532

## 533 ***Hard substrates***

534 On each sampling point, within each marina, the organisms fouling the marina's hard substrates,  
535 such as pontoons, cables, ropes, and buoys, were scraped from a total area of 22 x 22 cm, into

536 zip-lock bags, and stored at 4 °C with water from each site, until processing. In the lab, the samples  
537 were poured through a 500 µm mesh sieve (previously washed with 10% bleach), with the water  
538 of each respective bag, and the organisms retained in the sieve were stored in containers with  
539 absolute ethanol, at -20 °C, until DNA extraction.

540

#### 541 *Artificial substrates*

542 Two types of artificial substrates were deployed on each sampling point: i) tri-dimensional nylon  
543 bath sponges, with 1 mm-mesh size, which can retain different organisms, as well as act as a  
544 substrate to sessile organisms and ii) white acrylic plates (similar to the material of the submerged  
545 part of the pontoons that was scraped) of 22 x 22 cm. These substrates (Fig. 7) were deployed on  
546 the 2nd of March 2020 on each point from each marina, close to the pontoons and with a depth  
547 of 1 m and collected and processed in the sampling dates above-mentioned. Due to the restrictions  
548 imposed by the COVID-19 outbreak, the artificial substrates sampled in the winter were deployed  
549 in the water column for longer (140 days total) than those sampled in spring (105 to 107 days)  
550 and autumn (119 days). On each sampling date, each artificial substrate was placed in separate  
551 zip-lock bags and stored at 4 °C, with water from each site, and new artificial substrates were  
552 deployed until the next sampling season. In the lab, the organisms fouling the tri-dimensional  
553 sponges as well as the water of each respective bag were thoroughly washed through a 500 µm  
554 sieve (previously washed with 10% bleach and MilliQ water). The plates were scraped and also  
555 washed through a 500 µm sieve. The organisms retained in the sieve were stored in containers  
556 with absolute ethanol, at -20 °C, until DNA extraction.

557

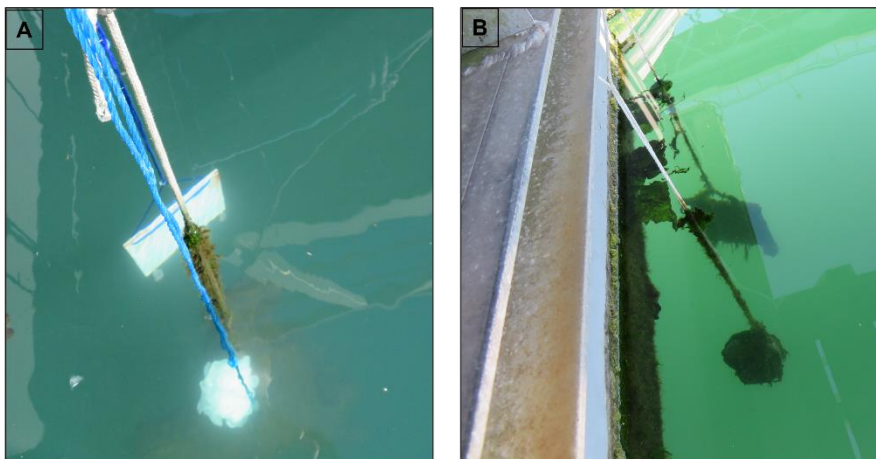

558  
559 **Fig. 7.** Pictures showing the employment of the artificial substrates. **A** Artificial substrates at the beginning of a  
560 sampling season. **B** Artificial substrates after colonization.

561

#### 562 *eDNA*

563 One litre of water at ca. 1 m depth was collected using a cable, close to the pontoons, in  
564 polypropylene flasks, previously washed with 10% bleach and rinsed with MilliQ water. The

565 cable was also previously cleaned with 10% bleach, before immersion at each sampling point. On  
566 each sampling point, each flask was washed 3 times with the water of the respective site. After  
567 collection, the water was stored at 4 °C for a maximum period of 24 h, filtered through a 0.45 µm  
568 pore size filter (S-Pak Filters, Millipore) and filters were then stored at -20 °C, until DNA  
569 extraction. Negative controls, consisting in one 1L flask, containing MilliQ water, was used  
570 throughout all the workflow (sampling, storage, sample processing in the lab, DNA extraction  
571 and PCR amplification) and processed as the eDNA samples.

572

### 573 ***Zooplankton***

574 Samples were obtained using a plankton net with 55 µm mesh size, with a mouth of 40 cm of  
575 diameter and 100 cm length. On each sampling point, 3 separate oblique tows were performed for  
576 45 seconds each and the end-cup content was poured into 1L polypropylene flasks, also previously  
577 washed with 10% bleach and MilliQ water. After collection, the concentrated samples were stored  
578 at 4 °C for a maximum period of 24 h and filtered through a 0.45 µm pore size filter (S-Pak Filters,  
579 Millipore) and filters were stored at -20 °C, until DNA extraction.

580

### 581 **DNA extraction**

582 The DNA from the hard and artificial substrates was extracted using a silica-based method,  
583 adapted from Ivanova et al. (2006), and as described by Steinke et al. (2022). Briefly, up to 30 g  
584 of ethanol-preserved organisms were placed in autoclaved flasks, previously washed with 10%  
585 bleach and Milli-Q water, to which an adequate volume of a Lysis Buffer (100 mM NaCl, 50 mM  
586 Tris-HCl pH 8.0, 10 mM EDTA pH 8.0 and 0.5% SDS) (depending on the sample wet weight),  
587 was added. Samples were then digested overnight in an orbital incubator (Infors MT Multitron  
588 Pro) at 40 rpm and 56 °C. The lysates were then centrifuged, and supernatants mixed with a  
589 Binding Mix (6M GuSCN, 20mM EDTA pH 8.0, 10mM Tris-HCl pH 6.4 and 4% Triton X-100)  
590 and purified through silica columns following 3 washing steps, with two ethanol-based solutions  
591 (Protein Wash Buffer and Wash Buffer). DNA was finally eluted from the columns using  
592 autoclaved deionized water.

593 Genomic DNA from eDNA and zooplankton samples was extracted from half of the filters using  
594 the DNeasy PowerSoil Kit (Qiagen), following the manufacturer's instructions.

595 Negative controls were processed along the DNA extraction procedure to check for  
596 contaminations of the solutions and labware materials used. These negative controls were used as  
597 templates in subsequent PCR amplification reactions.

598

### 599 **Amplicon libraries and high-throughput sequencing (HTS)**

600 Amplicon libraries and high-throughput sequencing (HTS) were carried out at Genoinseq  
601 (Biocant, Portugal). To amplify the internal region of 313 bp of the mitochondrial cytochrome c

602 oxidase I (COI) gene, the primer pair mlCOIintF (5'-  
603 GGWACWGGWTGAACWGTWTAYCCYCC - 3') (Leray et al. 2013) and LoboR1 (5'-  
604 TAAACYTCWGGRTGWCCRAARAAYCA - 3') (Lobo et al. 2013) was used, while the primer  
605 pair TAREuk454FWD1 (5'- CCAGCASCYGC GGTAATTCC - 3') and TAREukREV3 (5'-  
606 ACTTTCGTTCTTGATYRA - 3') (Stoeck et al. 2010; Lejzerowicz et al. 2015) was used to  
607 amplify the ~400 bp of the V4 hypervariable region of the 18S rRNA gene (18S). The two primer  
608 pairs were selected based on previous studies on marine invertebrates of the region (Duarte et al.,  
609 2023; Fais et al., 2020; Leite et al., 2021). For each sample, PCR reactions were performed using  
610 KAPA HiFi HotStart PCR kit according to manufacturer instructions. For the COI gene  
611 amplification, the PCR conditions involved a 3 min denaturation at 95°C, followed by 35 cycles  
612 of 98°C for 20 s, 60°C for 30 s and 72°C for 30 s and a final extension at 72°C for 5 min. For the  
613 18S gene, the PCR conditions involved a 3 min denaturation at 95°C, followed by 10 cycles of  
614 98°C for 20 s, 57°C for 30 s and 72°C for 30 s and 25 cycles of 98°C for 20 s, 47°C for 30 s and  
615 72°C for 30s, and a final extension at 72°C for 5 min.

616 Second limited-cycle PCR reactions added indexes and sequencing adapters to both ends of the  
617 amplified target regions according to manufacturer recommendations (Illumina 2013). For  
618 purification of the PCR products, the SequalPrep 96-well plate kit was used (ThermoFisher  
619 Scientific, Waltham, USA) (Comeau et al. 2017). The products were then pooled, and pair-end  
620 sequenced in the Illumina MiSeq® sequencer with the V3 chemistry, according to manufacturer  
621 instructions (Illumina, San Diego, CA, USA) at GenoInseq (Biocant, Portugal).

622

### 623 **Bioinformatics pipelines**

624 The raw reads (in fastq format) obtained from the Illumina MiSeq® System were subjected to  
625 quality filtering using PRINSEQ version 0.20.4 (Schmieder and Edwards 2011). This involved  
626 the elimination of sequencing adapters and reads with less than 100 bp for COI and less than 150  
627 bp for 18S. Additionally, bases with an average quality below Q25 within a 5-bases window were  
628 trimmed. The mothur software (version 1.39.5) was used to merge the filtered forward and reverse  
629 reads, by overlapping paired-end reads (make.contigs function, default alignment). Primer  
630 sequences were also removed during this step using the trim.seqs function (default settings)  
631 (Schloss et al. 2009; Kozich et al. 2013).

632 Two database pipelines were used to process the reads: mBrave – Multiplex Barcode Research  
633 and Visualization Environment ([www.mbrave.net](http://www.mbrave.net); Ratnasingham, 2019), which is connected to  
634 BOLD (Ratnasingham and Hebert 2007), was used for the COI reads; while the 18S reads were  
635 analyzed in the SILVA database (<https://ngs.arb-silva.de/silvangs/>; Quast et al., 2013).

636 In mBrave, the COI reads were uploaded using the sample batch function, and only length  
637 trimming was applied, with a maximum length set at 313 bp. Subsequently, low-quality reads  
638 were discarded based on two criteria: average quality value (QV) less than 10 and sequences

639 shorter than 150 bp. Reads satisfying these criteria underwent de-replication, followed by the  
640 removal of chimeras. The remaining reads were clustered into Operational Taxonomic Units  
641 (OTUs) using a distance threshold of 3%. Taxonomic assignment at the species level using a 97%  
642 similarity threshold was performed for the resulting OTUs by comparing them against the BOLD  
643 database, as well as against several public datasets specific for marine invertebrates of the  
644 Northeast Atlantic previously published: DS-GAIMARIN (Leite et al., 2020), DS-BIBLIO (Lobo  
645 et al., 2017), DS-PTGB (Lobo et al. 2016), DS-3150 (Lobo et al. 2017b), DS-PMACA (Vieira et  
646 al. 2022) and DS-NISEUREF (Lavrador et al. 2023). The Barcode Index Number (BIN) system  
647 englobe a cluster of COI nucleotide sequences to produce operational taxonomic units that usually  
648 represent a species molecularly, using well established algorithms in BOLD (Ratnasingham and  
649 Hebert 2013). In mBrave, HTS data is matched to these BINs whenever possible, to obtain a  
650 taxonomic identification of the sequences to species level, but for some cases a further audition  
651 and curation is needed. These matches were audited with the following methodology: 1) matches  
652 with BINs attributed to more than one species were identified and flagged; 2) those matches were  
653 audited using the protocol detailed in Lavrador et al., 2023. Briefly, matches with BINs attributed  
654 to 3 or more morphospecies were automatically discarded. On the other hand, BINs attributed to  
655 2 morphospecies were analysed for cases of synonyms or misidentification that could be solved.  
656 If these cases of discordances had resolution, taxonomic matches would remain for further  
657 analysis, otherwise the taxonomic assignment to species level was automatically discarded.  
658 In SILVAngs, the SILVA Incremental Aligner (SINA v1.2.10 for ARB SVN (revision 21008))  
659 (Pruesse et al. 2012) was used to align each read against the SILVA SSU rRNA SEED database  
660 and perform quality control (Quast et al. 2013). Criteria for exclusion were reads with less than  
661 150 aligned nucleotides and with more than 1% ambiguities or 2% homopolymers. Reads  
662 identified as putative contaminations or artifacts, based on low alignment quality (80 alignment  
663 identity, 40 alignment score reported by SINA), were also excluded from downstream processing.  
664 VSEARCH (version 2.14.2; <https://github.com/torognes/vsearch>) (Rognes et al. 2016) was used  
665 for dereplication and cluster of the unique reads in OTUs per sample, applying identity criteria of  
666 1.00 and 0.99, respectively. After these initial steps of quality control, identical reads were  
667 identified (dereplication), the unique reads were clustered (OTUs) on a per sample basis, and then  
668 the reference read of each OTU was taxonomically assigned. Taxonomic assignment was  
669 performed using BLASTn (2.2.30+; <http://blast.ncbi.nlm.nih.gov/Blast.cgi>) (Camacho et al.  
670 2009) with standard settings, against the non-redundant version of the SILVA SSU Ref dataset  
671 (release 138.1; <http://www.arb-silva.de>). The taxonomic classification of each OTU reference  
672 read was applied to all reads assigned to that respective OTU. Reads with weak or no  
673 classifications, with a "(% sequence identity + % alignment coverage)/2" value below 70, were  
674 assigned to the category "No Taxonomic Match." For subsequent analysis, only OTUs  
675 taxonomically identified with a similarity threshold of 99% were retained. NIS detected



676 exclusively with this marker were further analysed by performing a separate BLASTn with  
677 standard settings, against standard databases of NCBI, to verify the reliability of the taxonomic  
678 assignments.

679 For both markers, only reads assigned species level and that belonged to metazoan invertebrate  
680 groups were used for further analysis, since in the case of non-indigenous species, information at  
681 species level is mandatory for better tailoring an effective management strategy. Species  
682 taxonomic classification and environment were verified in the World Register of Marine Species  
683 (WoRMS) database ([www.marinespecies.org](http://www.marinespecies.org), accessed on 27th April 2023) (World Register of  
684 Marine Species, 2023). Only marine or oligohaline invertebrate species were retained.

685 For the identification of NIS, final species lists were matched to Portuguese invertebrate updated  
686 NIS lists (gently shared with us by Paula Chainho, which is the Portuguese contact point for the  
687 Working Group on Introductions and Transfers of Marine Organisms (WGITMO) of the ICES)  
688 as well as to an updated European NIS list. The European NIS list was obtained from three public  
689 databases: the European Alien Species Information Network (EASIN)  
690 (<https://easin.jrc.ec.europa.eu/easin>, accessed on 22nd March 2023) (Katsanevakis et al. 2012),  
691 the Information System on Aquatic Non-indigenous and Cryptogenic Species (AquaNIS)  
692 (<http://www.corpi.ku.lt/databases/index.php/aquanis/>, accessed on 17th March 2023) (Olenin et  
693 al. 2014) and the World Register of Introduced Marine Species (WRiMS)  
694 (<https://www.marinespecies.org/introduced>, accessed on 22nd March 2023) (Rius et al. 2022) (as  
695 described in Lavrador et al., 2023).

696

### 697 **Statistical analyses**

698 Venn diagrams were generated to determine the overlap between species and NIS detected with  
699 COI and 18S, as well as between species and NIS detected on each sample type, detected on each  
700 season and detected at each location (<https://bioinformatics.psb.ugent.be/webtools/Venn/>) were  
701 used to display the distribution of species and NIS among phyla, for each sampled marina, using  
702 GraphPad Prism v8 (GraphPad Software, Inc.).

703 Principal coordinate analysis (PCoA), using the Jaccard index, were performed to visualize the  
704 similarity on community structure among the different sample types and seasons, for each marina.  
705 A permutational variance analysis (PERMANOVA), using 999 permutations, was then used to  
706 test the effect of the factor's "season" and "sample type" on the community structure of the marine  
707 invertebrates recovered. PCoA and the PERMANOVA analysis were performed on Primer  
708 v6.1.16 (Clarke and Gorley 2006).

709

### 710 **Acknowledgements**

711 We would like to thank Paula Chainho, Romeu Ribeiro and João Gil for their help with identifying  
712 species as non-indigenous for Portugal. This work was funded by the project "NIS-DNA: Early

713 detection and monitoring of non-indigenous species (NIS) in coastal ecosystems based on high-  
714 throughput sequencing tools” funded by the Portuguese foundation of Science and Technology  
715 (FCT, I.P. under the reference PTDC/BIA-BMA/29754/2017) and by the “Contrato-Programa”  
716 (<https://doi.org/10.54499/UIDB/04050/2020>), funded by national funds through the FCT I.P.  
717 <https://doi.org/10.54499/UIDB/04050/2020>. Financial support granted by the FCT I.P. to S.D.  
718 (<https://doi.org/10.54499/CEECIND/00667/2017/CP1458/CT0001>) is also acknowledged.  
719 A.S.L. (UI/BD/150871/2021) is supported by the Collaboration Protocol for Financing the  
720 Multiannual Research Grants Plan for Doctoral Students with financial support from FCT I.P. and  
721 the European Social Fund under the Northern Regional Operational Program—Norte2020.

722

### 723 **Author Contributions**

724 SD and FOC conceptualized, administered and acquired funding for the study; ASL, SD, PEV,  
725 FGA and JM performed the sampling and laboratory procedures; ASL, SD and FOC analysed the  
726 data and discussed the results; ASL and SD wrote the paper; ASL, FGA, JM, PEV, FOC and SD  
727 revised and reviewed the paper. All authors have read and agreed to the published version of the  
728 manuscript.

729

### 730 **Declarations**

731 **Conflict of interest.** The authors declare that they do not have any conflict of interest.

732

733

734 **References**

- 735 Afonso I, Brecibar E, Castro N, Costa JL, Frias P, Henriques F, Moreira P, Oliveira PM, Silva  
736 G, Chainho P (2020) Assessment of the colonization and dispersal success of non-  
737 indigenous species introduced in recreational marinas along the estuarine gradient. *Ecol*  
738 *Indic* 113:106147. doi: 10.1016/j.ecolind.2020.106147
- 739 Alekseev VR, Starobogatov YI (1996) Types of diapause in Crustacea: definitions, distribution,  
740 evolution. *Hydrobiologia* 320:15–26. doi: 10.1007/bf00016801
- 741 Ammon U von, Wood SA, Laroche O, Zaiko A, Tait L, Lavery S, Inglis GJ, Pochon X (2018)  
742 Combining morpho-taxonomy and metabarcoding enhances the detection of non-  
743 indigenous marine pests in biofouling communities. *Sci Rep* 8:1–11. doi: 10.1038/s41598-  
744 018-34541-1
- 745 Bailey SA, Brown L, Campbell ML, Canning-Clode J, Carlton JT, Castro N, Chainho P, Chan  
746 FT, Creed JC, Curd A, Darling J, Fofonoff P, Galil BS, Hewitt CL, Inglis GJ, Keith I,  
747 Mandrak NE, Marchini A, McKenzie CH, Occhipinti-Ambrogi A, Ojaveer H, Pires-  
748 Teixeira LM, Robinson TB, Ruiz GM, Seward K, Schwindt E, Son MO, Therriault TW,  
749 Zhan A (2020) Trends in the detection of aquatic non-indigenous species across global  
750 marine, estuarine and freshwater ecosystems: A 50-year perspective. *Divers Distrib*  
751 26:1780–1797. doi: 10.1111/ddi.13167
- 752 Barnes DKA (2002) Invasions by marine life on plastic debris. *Nature* 416:808–809. doi:  
753 10.1016/j.amjms.2016.03.015
- 754 Bax N, Williamson A, Aguero M, Gonzalez E, Geeves W (2003) Marine invasive alien species:  
755 A threat to global biodiversity. *Mar Policy* 27:313–323. doi: 10.1016/S0308-  
756 597X(03)00041-1
- 757 Blomquist EM, Bonsdorff E (1986) Spatial and Temporal Variations of Benthic Macrofauna in  
758 a Sandbottom Area on Aland, Northern Baltic Sea. *Ophelia Suppl.* 4:27–36.
- 759 Borrell YJ, Miralles L, Do Huu H, Mohammed-Geba K, Garcia-Vazquez E (2017) DNA in a  
760 bottle - Rapid metabarcoding survey for early alerts of invasive species in ports. *PLoS One*  
761 12:1–17. doi: 10.1371/journal.pone.0183347
- 762 Boss KJ (1974) Oblomovism in the Mollusca. *Trans Am Microsc Soc* 93:460–481. doi:  
763 10.2307/3225152
- 764 Brusca RC, Moore W, Shuster SM (2016) *Invertebrates (Second Edition)*. Sinauer Associates
- 765 Camacho C, Coulouris G, Avagyan V, Ma N, Papadopoulos J, Bealer K, Madden TL (2009)  
766 BLAST+: Architecture and applications. *BMC Bioinformatics* 10:1–9. doi: 10.1186/1471-  
767 2105-10-421
- 768 Canning-Clode J, Fofonoff P, McCann L, Carlton JT, Ruiz G (2013) Marine invasions on a  
769 subtropical island: Fouling studies and new records in a recent marina on Madeira island  
770 (Eastern Atlantic Ocean). *Aquat Invasions* 8:261–270. doi: 10.3391/ai.2013.8.3.02

- 771 Chainho P, Fernandes A, Amorim A, Ávila SP, Canning-Clode J, Castro JJ, Costa AC, Costa  
772 JL, Cruz T, Gollasch S, Grazziotin-Soares C, Melo R, Micael J, Parente MI, Semedo J,  
773 Silva T, Sobral D, Sousa M, Torres P, Veloso V, Costa MJ (2015) Non-indigenous species  
774 in Portuguese coastal areas, coastal lagoons, estuaries and islands. *Estuar Coast Shelf Sci*  
775 167:199–211. doi: 10.1016/j.ecss.2015.06.019
- 776 Chebaane S, Sempere-Valverde J, Dorai S, Kacem A, Sghaier YR (2019) A Preliminary  
777 inventory of alien and cryptogenic species in Monastir Bay, Tunisia: spatial distribution,  
778 introduction trends and pathways. *Mediterr Mar Sci* 20:616–626. doi:  
779 10.12681/mms.20229
- 780 Clarke KR, Gorley RN (2006) *Primer V6: User Manual - Tutorial*. Plymouth Marine Laboratory
- 781 Cloern JE, Jassby AD (2010) Patterns and scales of phytoplankton variability in estuarine-  
782 coastal ecosystems. *Estuaries and Coasts* 33:230–241. doi: 10.1007/s12237-009-9195-3
- 783 Comeau AM, Douglas GM, Langille MGI (2017) Microbiome Helper: a Custom and  
784 Streamlined Workflow for Microbiome Research. *mSystems*. doi:  
785 10.1128/msystems.00127-16
- 786 Costanza R, D'Arge R, de Groot R, Farber S, Grasso M, Hannon B, Limburg K, Naeem S,  
787 O'Neill R V., Paruelo J, Raskin RG, Sutton P, van den Belt M (1997) The value of the  
788 world's ecosystem services and natural capital. *Nature* 387:253–260.
- 789 Cristescu ME (2014) From barcoding single individuals to metabarcoding biological  
790 communities: Towards an integrative approach to the study of global biodiversity. *Trends*  
791 *Ecol Evol* 29:566–571. doi: 10.1016/j.tree.2014.08.001
- 792 Decreto-Lei n° 92/2019 (2019) Assembleia da República, 10 de julho de 2019. *Diário da*  
793 *República*, 1ª série — N° 130 5688–5724.
- 794 Deiner K, Lopez J, Bourne S, Holman L, Seymour M, Grey EK, Lacoursière A, Li Y, Renshaw  
795 MA, Pfrender ME, Rius M, Bernatchez L, Lodge DM (2018) Optimising the detection of  
796 marine taxonomic richness using environmental DNA metabarcoding: the effects of filter  
797 material, pore size and extraction method. *Metabarcoding and Metagenomics* 2:1–15. doi:  
798 10.3897/mbmg.2.28963
- 799 Diagne C, Leroy B, Vaissière AC, Gozlan RE, Roiz D, Jarić I, Salles JM, Bradshaw CJA,  
800 Courchamp F (2021) High and rising economic costs of biological invasions worldwide.  
801 *Nature* 592:571–576. doi: 10.1038/s41586-021-03405-6
- 802 Duarte S, Vieira PE, Lavrador AS, Costa FO (2021) Status and prospects of marine NIS  
803 detection and monitoring through (e)DNA metabarcoding. *Sci Total Environ*. doi:  
804 10.1016/j.scitotenv.2020.141729
- 805 Duarte S, Vieira PE, Leite BR, Teixeira MAL, Neto JM, Costa FO (2023) Macrozoobenthos  
806 monitoring in Portuguese transitional waters in the scope of the water framework directive  
807 using morphology and DNA metabarcoding. *Estuar Coast Shelf Sci*. doi:

- 808 10.1016/j.ecss.2022.108207
- 809 Duncan M, Chow B, Myron K, Stone J, Hubbell M, Schriock E, Hunt C, Khtikian WK, Cohen  
810 CS (2022) First report of genetic data from two invasive Watersipora (Bryozoa) species in  
811 the central California coast rocky intertidal. *Aquat Invasions* 17:136–152. doi:  
812 10.3391/AI.2022.17.2.01
- 813 European Commission (2008) Towards an EU Strategy on Invasive Species. COM/2008/789.
- 814 European Environment Agency (2021) European Maritime Transport Environmental Report  
815 2021.
- 816 European Union (2014) Regulation (EU) No 1143/2014 of the European Parliament and the  
817 Council of 22 October 2014 on the prevention and management of the introduction and  
818 spread of invasive alien species. *Off J Eur Union* 317:35–55.
- 819 Fais M, Bellisario B, Duarte S, Vieira PE, Sousa R, Canchaya C, Costa FO (2020) Meiofauna  
820 metabarcoding in Lima estuary (Portugal) suggests high taxon replacement within a  
821 background of network stability. *Reg Stud Mar Sci* 38:101341. doi:  
822 10.1016/j.rsma.2020.101341
- 823 Ferrario J, Caronni S, Occhipinti-ambrogi A, Marchini A (2017) Role of commercial harbours  
824 and recreational marinas in the spread of non-indigenous fouling species non-indigenous  
825 fouling species. *Biofouling* 33:651–660. doi: 10.1080/08927014.2017.1351958
- 826 Fonseca VG, Davison PI, Creach V, Stone D, Bass D, Tidbury HJ (2023) The Application of  
827 eDNA for Monitoring Aquatic Non-Indigenous Species: Practical and Policy  
828 Considerations.
- 829 Fontes JT, Vieira PE, Ekrem T, Soares P, Costa FO (2021) BAGS: An automated Barcode,  
830 Audit & Grade System for DNA barcode reference libraries. *Mol Ecol Resour* 21:573–  
831 583. doi: 10.1111/1755-0998.13262
- 832 Gittenberger A, Rensing M, Faasse M, Walraven L Van, Smolders S, Perez HK, Gittenberger E  
833 (2023) Non-Indigenous Species Dynamics in Time and Space within the Coastal Waters of  
834 The Netherlands. *Diversity* 15:719.
- 835 Glasby TM, Connell SD, Holloway MG, Hewitt CL (2007) Nonindigenous biota on artificial  
836 structures: Could habitat creation facilitate biological invasions? *Mar Biol* 151:887–895.  
837 doi: 10.1007/s00227-006-0552-5
- 838 Grey EK, Bernatchez L, Cassey P, Deiner K, Deveney M, Howland KL, Lacoursière-roussel A,  
839 Leong SCY, Li Y, Olds B, Pfrender ME, Prowse TAA, Renshaw MA, Lodge DM (2018)  
840 Effects of sampling effort on biodiversity patterns estimated from environmental DNA  
841 metabarcoding surveys. *Sci Rep*. doi: 10.1038/s41598-018-27048-2
- 842 Hajibabaei M (2012) The golden age of DNA metasystematics. *Trends Genet* 28:535–537. doi:  
843 10.1016/j.tig.2012.08.001
- 844 Hebert PDN, Ratnasingham S, DeWaard JR (2003) Barcoding animal life : cytochrome c

- 845 oxidase subunit 1 divergences among closely related species. *Proc R Soc B Biol Sci*  
846 270:S96–S99. doi: 10.1098/rsbl.2003.0025
- 847 Holman LE, de Bruyn M, Creer S, Carvalho G, Robidart J, Rius M (2019) Detection of  
848 introduced and resident marine species using environmental DNA metabarcoding of  
849 sediment and water. *Sci Rep* 9:1–10. doi: 10.1038/s41598-019-47899-7
- 850 Hopkins GW, Freckleton RP (2002) Declines in the numbers of amateur and professional  
851 taxonomists: Implications for conservation. *Anim Conserv* 5:245–249. doi:  
852 10.1017/S1367943002002299
- 853 Huhn M, Madduppa HH, Khair M, Sabrian A, Irawati Y, Anggraini NP, Wilkinson SP,  
854 Simpson T, Iwasaki K, Setiamarga DHE, Dias PJ (2020) Keeping up with introduced  
855 marine species at a remote biodiversity hotspot: awareness, training and collaboration  
856 across different sectors is key. *Biol Invasions* 22:749–771. doi: 10.1007/s10530-019-  
857 02126-2
- 858 Ibabe A, Rayón F, Martínez JL, García-Vázquez E (2020) Environmental DNA from plastic and  
859 textile marine litter detects exotic and nuisance species nearby ports. *PLoS One*  
860 15:e0228811. doi: 10.1371/journal.pone.0228811
- 861 Ivanova N V., Dewaard JR, Hebert PDN (2006) An inexpensive, automation-friendly protocol  
862 for recovering high-quality DNA. *Mol Ecol Notes* 6:998–1002. doi: 10.1111/j.1471-  
863 8286.2006.01428.x
- 864 Jackson JBC, Kirby MX, Berger WH, Bjørndal KA, Botsford LW, Bourque BJ, Bradbury RH,  
865 Cooke R, Erlandson J, Estes JA, Hughes TP, Kidwell S, Lange CB, Lenihan HS, Pandolfi  
866 JM, Peterson CH, Steneck RS, Tegner MJ, Warner RR, Jones K, Estes JA, Hughes TP,  
867 Kidwell S, Lange CB, Lenihan HS, Pandolfi JM, Peterson CH, Steneck RS, Tegner MJ,  
868 Warner RR (2001) Historical Overfishing and the Recent Collapse of Coastal Ecosystems.  
869 *Science* (80- ) 293:629–638. doi: 10.1126/science.1059199
- 870 Jensen KR, Andersen P, Andersen NR, Bruhn A, Buur H, Carl H, Jakobsen H, Jaspers C,  
871 Lundgreen K, Nielsen R, Strandberg B, Stæhr PAU (2023) Reviewing Introduction  
872 Histories, Pathways, Invasiveness, and Impact of Non-Indigenous Species in Danish  
873 Marine Waters. *Diversity* 15:434. doi: 10.3390/d15030434
- 874 Ji Y, Ashton L, Pedley SM, Edwards DP, Tang Y, Nakamura A, Kitching R, Dolman PM,  
875 Woodcock P, Edwards FA, Larsen TH, Hsu WW, Benedick S, Hamer KC, Wilcove DS,  
876 Bruce C, Wang X, Levi T, Lott M, Emerson BC, Yu DW (2013) Reliable, verifiable and  
877 efficient monitoring of biodiversity via metabarcoding. *Ecol Lett* 16:1245–1257. doi:  
878 10.1111/ele.12162
- 879 Katsanevakis S, Bogucarskis K, Gatto F, Vandekerckhove J, Deriu I, Cardoso AC (2012)  
880 Building the European Alien Species Information Network (EASIN): A novel approach  
881 for the exploration of distributed alien species data. *BioInvasions Rec* 1:235–245. doi:

- 882 10.3391/bir.2012.1.4.01
- 883 Katsanevakis S, Zenetos A, Belchior C, Cardoso AC (2013) Invading European Seas: Assessing  
884 pathways of introduction of marine aliens. *Ocean Coast Manag* 76:64–74. doi:  
885 10.1016/j.ocecoaman.2013.02.024
- 886 Katsanevakis S, Wallentinus I, Zenetos A, Leppäkoski E, Çinar ME, Oztürk B, Grabowski M,  
887 Golani D, Cardoso AC (2014) Impacts of invasive alien marine species on ecosystem  
888 services and biodiversity: A pan-European review. *Aquat Invasions* 9:391–423. doi:  
889 10.3391/ai.2014.9.4.01
- 890 Kim KC, Byrne LB (2006) Biodiversity loss and the taxonomic bottleneck: Emerging  
891 biodiversity science. *Ecol Res* 21:794–810. doi: 10.1007/s11284-006-0035-7
- 892 Knowlton N (1993) Sibling species in the sea. *Annu Rev Ecol Syst* 24:189–216.
- 893 Kozich JJ, Westcott SL, Baxter NT, Highlander SK, Schloss PD (2013) Development of a dual-  
894 index sequencing strategy and curation pipeline for analyzing amplicon sequence data on  
895 the miseq illumina sequencing platform. *Appl Environ Microbiol* 79:5112–5120. doi:  
896 10.1128/AEM.01043-13
- 897 Koziol A, Stat M, Simpson T, Jarman S, DiBattista JD, Harvey ES, Marnane M, McDonald J,  
898 Bunce M (2018) Environmental DNA metabarcoding studies are critically affected by  
899 substrate selection. *Mol Ecol Resour* 19:366–376. doi: 10.1111/1755-0998.12971
- 900 Kraus R, Ninčević-gladan Ž, Auriemma R, Bastianini M, Bolognini L, Cabrini M, Cara M,  
901 Čalić M, Campanelli A, Cvitković I, Despalatović M, Dragičević B, Drakulović D, Dulčić  
902 J, Flander-putrle V, Grati F, Grego M, Grilli F, Jaklin A, Janeković I, Kolutari J, Lipej L,  
903 Magaletti E, Marini M, Matić-skoko S, Mavrič B, Mikuš J, Mozetič P, Orlando-bonaca M  
904 (2019) Strategy of port baseline surveys (PBS) in the Adriatic Sea. *Mar Pollut Bull*  
905 147:47–58. doi: 10.1016/j.marpolbul.2018.08.067
- 906 Lavrador AS, Fontes JT, Vieira PE, Costa FO, Duarte S (2023) Compilation, Revision, and  
907 Annotation of DNA Barcodes of Marine Invertebrate Non-Indigenous Species (NIS)  
908 Occurring in European Coastal Regions. *Diversity*. doi: 10.3390/d15020174
- 909 Leduc N, Lacoursière-Roussel A, Howland KL, Archambault P, Sevellec M, Normandeau E,  
910 Dispas A, Winkler G, McKindsey CW, Simard N, Bernatchez L (2019) Comparing eDNA  
911 metabarcoding and species collection for documenting Arctic metazoan biodiversity.  
912 *Environ DNA* 1:342–358. doi: 10.1002/edn3.35
- 913 Lehtiniemi M, Ojaveer H, David M, Galil B, Gollasch S, Mckenzie C, Minchin D, Occhipinti-  
914 ambrogio A, Olenin S, Pederson J (2015) Dose of truth — Monitoring marine non-  
915 indigenous species to serve legislative requirements. *Mar Policy* 54:26–35. doi:  
916 10.1016/j.marpol.2014.12.015
- 917 Leite BR, Vieira PE, Teixeira MAL, Lobo-Arteaga J, Hollatz C, Borges LMS, Duarte S,  
918 Troncoso JS, Costa FO (2020) Gap-analysis and annotated reference library for supporting

- 919 macroinvertebrate metabarcoding in Atlantic Iberia. *Reg Stud Mar Sci* 36:101307. doi:  
920 10.1016/j.rsma.2020.101307
- 921 Leite BR, Vieira PE, Troncoso JS, Costa FO (2021) Comparing species detection success  
922 between molecular markers in DNA metabarcoding of coastal macroinvertebrates.  
923 *Metabarcoding and Metagenomics* 5:249–260. doi: 10.3897/MBMG.5.70063
- 924 Lejzerowicz F, Esling P, Pillet L, Wilding TA, Black KD, Pawlowski J (2015) High-throughput  
925 sequencing and morphology perform equally well for benthic monitoring of marine  
926 ecosystems. *Sci Rep* 5:1–10. doi: 10.1038/srep13932
- 927 Leray M, Yang JY, Meyer CP, Mills SC, Agudelo N, Ranwez V, Boehm JT, Machida RJ (2013)  
928 A new versatile primer set targeting a short fragment of the mitochondrial COI region for  
929 metabarcoding metazoan diversity: Application for characterizing coral reef fish gut  
930 contents. *Front Zool* 10:1–14. doi: 10.1186/1742-9994-10-34
- 931 Lobo J, Costa PM, Teixeira MAL, Ferreira MSG, Costa MH, Costa FO (2013) Enhanced  
932 primers for amplification of DNA barcodes from a broad range of marine metazoans.  
933 *BMC Ecol* 13:1. doi: 10.1186/1472-6785-13-34
- 934 Lobo J, Teixeira MAL, Borges LMS, Ferreira MSG, Hollatz C, Gomes PT, Sousa R, Ravara A,  
935 Costa MH, Costa FO (2016) Starting a DNA barcode reference library for shallow water  
936 polychaetes from the southern European Atlantic coast. *Mol Ecol Resour* 16:298–313. doi:  
937 10.1111/1755-0998.12441
- 938 Lobo J, Ferreira MS, Antunes IC, Teixeira MAL, Borges LMS, Sousa R, Gomes PA, Costa  
939 MH, Cunha MR, Costa FO (2017a) Contrasting morphological and DNA barcode  
940 suggested species boundaries among shallow-water amphipod fauna from the southern  
941 European Atlantic coast. *Genome*. doi: <https://doi.org/10.1139/gen-2016-0009>
- 942 Lobo J, Shokralla S, Costa MH, Hajibabaei M, Costa FO (2017b) DNA metabarcoding for high-  
943 throughput monitoring of estuarine macrobenthic communities. *Sci Rep* 7:1–13. doi:  
944 10.1038/s41598-017-15823-6
- 945 Lowe S, Browne M, Boudjelas S, De Poorter M (2000) 100 of the World's Worst Invasive  
946 Alien Species. A selection from the Global Invasive Species Database. The Invasive  
947 Species Specialist Group (ISSG)
- 948 MacKie JA, Darling JA, Geller JB (2012) Ecology of cryptic invasions: Latitudinal segregation  
949 among *Watersipora* (Bryozoa) species. *Sci Rep* 2:1–10. doi: 10.1038/srep00871
- 950 Mancinelli G, Chainho P, Cilenti L, Falco S, Kaporis K, Katselis G, Ribeiro F (2017) The  
951 Atlantic blue crab *Callinectes sapidus* in southern European coastal waters: Distribution,  
952 impact and prospective invasion management strategies. *Mar Pollut Bull* 119:5–11. doi:  
953 10.1016/j.marpolbul.2017.02.050
- 954 Martínez-laiz G, Ulman A, Ros M, Marchini A (2019) Is recreational boating a potential vector  
955 for non-indigenous peracarid crustaceans in the Mediterranean Sea ? A combined



- 956 biological and social approach. *Mar Pollut Bull* 140:403–415. doi:  
957 10.1016/j.marpolbul.2019.01.050
- 958 Olenin S, Narščius A, Minchin D, David M, Galil B, Gollasch S, Marchini A, Occhipinti-  
959 Ambrogi A, Ojaveer H, Zaiko A (2014) Making non-indigenous species information  
960 systems practical for management and useful for research: An aquatic perspective. *Biol*  
961 *Conserv* 173:98–107. doi: 10.1016/j.biocon.2013.07.040
- 962 Pawlowski J, Kelly-Quinn M, Altermatt F, Apothéloz-Perret-Gentil L, Beja P, Boggero A,  
963 Borja A, Bouchez A, Cordier T, Domaizon I, Feio MJ, Filipe AF, Fornaroli R, Graf W,  
964 Herder J, van der Hoorn B, Iwan Jones J, Sagova-Mareckova M, Moritz C, Barquín J,  
965 Piggott JJ, Pinna M, Rimet F, Rinkevich B, Sousa-Santos C, Specchia V, Trobajo R,  
966 Vasselon V, Vitecek S, Zimmerman J, Weigand A, Leese F, Kahlert M (2018) The future  
967 of biotic indices in the ecogenomic era: Integrating (e)DNA metabarcoding in biological  
968 assessment of aquatic ecosystems. *Sci Total Environ* 637–638:1295–1310. doi:  
969 10.1016/j.scitotenv.2018.05.002
- 970 Pearman JK, von Ammon U, Laroche O, Zaiko A, Wood SA, Zubia M, Planes S, Pochon X  
971 (2021) Metabarcoding as a tool to enhance marine surveillance of nonindigenous species  
972 in tropical harbors: A case study in Tahiti. *Environ DNA* 3:173–189. doi:  
973 10.1002/edn3.154
- 974 Png-Gonzalez L, Ramalhosa P, Gestoso I, Álvarez S, Nogueira N (2021) Non-indigenous  
975 species on artificial coastal environments: Experimental comparison between aquaculture  
976 farms and recreational marinas. *J Mar Sci Eng* 9:1121. doi: 10.3390/jmse9101121
- 977 Png-Gonzalez L, Comas-González R, Calvo-Manazza M, Follana-Berná G, Ballesteros E, Díaz-  
978 Tapia P, Falcón JM, Raso JEG, Gofas S, González-Porto M, López E, Ramos-Esplá AA,  
979 Velasco E, Carbonell A (2023) Updating the National Baseline of Non-Indigenous Species  
980 in Spanish Marine Waters.
- 981 Pochon X, Zaiko A, Hopkins GA, Banks JC, Wood SA (2015) Early detection of eukaryotic  
982 communities from marine biofilm using high-throughput sequencing: an assessment of  
983 different sampling devices. *Biofouling* 31:241–251. doi: 10.1080/08927014.2015.1028923
- 984 Porto de Viana do Castelo (2017) *Port Handbook - Porto de Viana do Castelo 2016/2017*.  
985 Enigma Editores
- 986 Pruesse E, Peplies J, Glöckner FO (2012) SINA: Accurate high-throughput multiple sequence  
987 alignment of ribosomal RNA genes. *Bioinformatics* 28:1823–1829. doi:  
988 10.1093/bioinformatics/bts252
- 989 Quast C, Pruesse E, Yilmaz P, Gerken J, Schweer T, Yarza P, Peplies J, Glöckner FO (2013)  
990 The SILVA ribosomal RNA gene database project: Improved data processing and web-  
991 based tools. *Nucleic Acids Res* 41:590–596. doi: 10.1093/nar/gks1219
- 992 Radulovici AE, Vieira PE, Duarte S, Teixeira MAL, Borges LMS, Deagle BE, Majaneva S,

- 993 Redmond N, Schultz JA, Costa FO (2021) Revision and annotation of DNA barcode  
994 records for marine invertebrates: Report of the 8th iBOL conference hackathon.  
995 *Metabarcoding and Metagenomics* 5:207–217. doi: 10.3897/mbmg.5.67862
- 996 Ratnasingham S (2019) mBRAVE: The Multiplex Barcode Research And Visualization  
997 Environment. In: *Biodiversity Information Science and Standards*. p e37986
- 998 Ratnasingham S, Hebert PDN (2007) BOLD: The Barcode of Life Data System: Barcoding.  
999 *Mol Ecol Notes* 7:355–364. doi: 10.1111/j.1471-8286.2007.01678.x
- 1000 Ratnasingham S, Hebert PDN (2013) A DNA-Based Registry for All Animal Species: The  
1001 Barcode Index Number (BIN) System. *PLoS One*. doi: 10.1371/journal.pone.0066213
- 1002 Rey A, Carney KJ, Quinones LE, Pagenkopp Lohan KM, Ruiz GM, Basurko OC, Rodríguez-  
1003 Ezpeleta N (2019) Environmental DNA Metabarcoding: A Promising Tool for Ballast  
1004 Water Monitoring. *Environ Sci Technol* 53:11849–11859. doi: 10.1021/acs.est.9b01855
- 1005 Rey A, Basurko OC, Rodríguez-Ezpeleta N (2020) Considerations for metabarcoding-based  
1006 port biological baseline surveys aimed at marine nonindigenous species monitoring and  
1007 risk assessments. *Ecol Evol* 00:1–14. doi: 10.1002/ece3.6071
- 1008 Rilov G, Crooks JA (2009) *Biological Invasions in Marine Ecosystems. Ecological,  
1009 Management and Geographic Perspectives*. Springer
- 1010 Rius M, Ahyong S, Bieler R, Boudouresque C, Costello MJ, Downey R, Galil BS, Gollasch S,  
1011 Hutchings P, Kamburska L, Katsanevakis S, Kupriyanova E, Lejeusne C, Marchini A,  
1012 Occhipinti A, Pagad S, Panov VE, Poore GCB, Robinson TB, Sterrer W, Turon X, Valls  
1013 Domedel G, Verleye T, Vieira LM, Willan RC, Yeo Chong Jinn D, Zhan A (2022) World  
1014 Register of Introduced Marine Species (WRiMS). In: *World Regist. Introd. Mar. Species*.  
1015 <https://www.marinespecies.org/introduced>. Accessed 15 Sep 2021
- 1016 Rognes T, Flouri T, Nichols B, Quince C, Mahé F (2016) VSEARCH: A versatile open source  
1017 tool for metagenomics. *PeerJ* 2016:1–22. doi: 10.7717/peerj.2584
- 1018 Ruppert KM, Kline RJ, Rahman MS (2019) Past, present, and future perspectives of  
1019 environmental DNA (eDNA) metabarcoding: A systematic review in methods, monitoring,  
1020 and applications of global eDNA. *Glob Ecol Conserv* 17:e00547. doi:  
1021 10.1016/j.gecco.2019.e00547
- 1022 Sardain A, Sardain E, Leung B (2019) Global forecasts of shipping traffic and biological  
1023 invasions to 2050. *Nat Sustain* 2:274–282. doi: 10.1038/s41893-019-0245-y
- 1024 Schloss PD, Westcott SL, Ryabin T, Hall JR, Hartmann M, Hollister EB, Lesniewski RA,  
1025 Oakley BB, Parks DH, Robinson CJ, Sahl JW, Stres B, Thallinger GG, Van Horn DJ,  
1026 Weber CF (2009) Introducing mothur: Open-source, platform-independent, community-  
1027 supported software for describing and comparing microbial communities. *Appl Environ  
1028 Microbiol* 75:7537–7541. doi: 10.1128/AEM.01541-09
- 1029 Steinke D, DeWaard SL, Sones JE, Ivanova N V., Prosser SWJ, Perez K, Braukmann TWA,

- 1030 Milton M, Zakharov E V., Dewaard JR, Ratnasingham S, Hebert PDN (2022) Message in  
1031 a Bottle - Metabarcoding enables biodiversity comparisons across ecoregions. *Gigascience*  
1032 11:1–11. doi: 10.1093/gigascience/giac040
- 1033 Stoeck T, Bass D, Nebel M, Christen R, Jones MDM, Breiner H-W, Richards TA (2010)  
1034 Multiple marker parallel tag environmental DNA sequencing reveals a highly complex  
1035 eukaryotic community in marine anoxic water. *Mol Ecol* 19:21–31. doi: 10.1111/j.1365-  
1036 294X.2009.04480.x
- 1037 Suarez-Menendez M, Planes S, Garcia-Vazquez E, Ardura A (2020) Early Alert of Biological  
1038 Risk in a Coastal Lagoon Through eDNA Metabarcoding. *Front Ecol Evol* 8:1–10. doi:  
1039 10.3389/fevo.2020.00009
- 1040 Taberlet P, Coissac E, Hajibabaei M, Rieseberg LH (2012) Environmental DNA. *Mol Ecol*  
1041 21:1789–1793. doi: 10.1111/j.1365-294X.2012.05542.x
- 1042 Tempesti J, Langeneck J, Romani L, Garrido M, Lardicci C, Maltagliati F, Castelli A (2022)  
1043 Harbour type and use destination shape fouling community and non-indigenous species  
1044 assemblage: A study of three northern Tyrrhenian port systems ( Mediterranean Sea ). *Mar*  
1045 *Pollut Bull* 174:113191. doi: 10.1016/j.marpolbul.2021.113191
- 1046 Therriault TW, Nelson JC, Carlton JT, Liggan L, Otani M, Kawai H, Scriven D, Ruiz GM,  
1047 Clarke Murray C (2018) The invasion risk of species associated with Japanese Tsunami  
1048 Marine Debris in Pacific North America and Hawaii. *Mar Pollut Bull* 132:82–89. doi:  
1049 10.1016/j.marpolbul.2017.12.063
- 1050 Turner RE, Rabalais NN (1994) Coastal eutrophication near the Mississippi river delta. *Nature*  
1051 368:619–621. doi: 10.2307/1311453
- 1052 Vieira PE, Desiderato A, Azevedo SL, Esquete P, Costa FO, Queiroga H (2022) Molecular  
1053 evidence for extensive discontinuity between peracarid (Crustacea) fauna of Macaronesian  
1054 islands and nearby continental coasts: over fifty candidate endemic species. *Mar Biol*  
1055 169:1–13. doi: 10.1007/s00227-022-04051-w
- 1056 Vinagre PA, Simas T, Cruz E, Pinori E, Svenson J (2020) Marine biofouling: A European  
1057 database for the marine renewable energy sector. *J Mar Sci Eng*. doi:  
1058 10.3390/JMSE8070495
- 1059 Weigand H, Beermann AJ, Čiampor F, Costa FO, Csabai Z, Duarte S, Geiger MF, Grabowski  
1060 M, Rimet F, Rulik B, Strand M, Szucsich N, Weigand AM, Willassen E, Wyler SA,  
1061 Bouchez A, Borja A, Čiamporová-Zaťovičová Z, Ferreira S, Dijkstra KDB, Eisendle U,  
1062 Freyhof J, Gadawski P, Graf W, Haegerbaeumer A, van der Hoorn BB, Japoshvili B,  
1063 Keresztes L, Keskin E, Leese F, Macher JN, Mamos T, Paz G, Pešić V, Pfannkuchen DM,  
1064 Pfannkuchen MA, Price BW, Rinkevich B, Teixeira MAL, Várbíró G, Ekrem T (2019)  
1065 DNA barcode reference libraries for the monitoring of aquatic biota in Europe: Gap-  
1066 analysis and recommendations for future work. *Sci Total Environ* 678:499–524. doi:

- 1067            10.1016/j.scitotenv.2019.04.247
- 1068    Westfall KM, Therriault TW, Abbott CL (2020) A new approach to molecular biosurveillance  
1069            of invasive species using DNA metabarcoding. *Glob Chang Biol* 26:1012–1022. doi:  
1070            10.1111/gcb.14886
- 1071    Wood SA, Pochon X, Laroche O, von Ammon U, Adamson J, Zaiko A (2019) A comparison of  
1072            droplet digital polymerase chain reaction (PCR), quantitative PCR and metabarcoding for  
1073            species-specific detection in environmental DNA. *Mol Ecol Resour* 19:1407–1419. doi:  
1074            10.1111/1755-0998.13055
- 1075    World Register of Marine Species WoRMS Editorial Board.
- 1076    Zenetos A, Tsiamis K, Galanidi M, Carvalho N, Bartilotti C, Canning-Clode J, Castriota L,  
1077            Chainho P, Comas-González R, Costa AC, Dragičević B, Dulčić J, Faasse M, Florin AB,  
1078            Gittenberger A, Jakobsen H, Jelmert A, Kerckhof F, Lehtiniemi M, Livi S, Lundgreen K,  
1079            Macic V, Massé C, Mavrič B, Naddafi R, Orlando-Bonaca M, Petovic S, Png-Gonzalez L,  
1080            Carbonell Quetglas A, Ribeiro RS, Cidade T, Smolders S, Stæhr PAU, Viard F, Outinen O  
1081            (2022) Status and Trends in the Rate of Introduction of Marine Non-Indigenous Species in  
1082            European Seas. *Diversity*. doi: 10.3390/d14121077
- 1083
